# Supplementary material for: A novel Microproteomic Approach Using Laser Capture Microdissection to Study Cellular Protrusions
Source: MDPI journal article supplement (doi:10.3390/ijms20051172), 2019-03-07
Supplement: s1 [file s1]

**“exclusive”**

[illegible]

**“exclusive”**

**mitochondrion** (GO:0005739) whole membrane (GO:0008805)  
phagocytic vesicle (GO:0045335) endoplasmic reticulum complex (GO:0006502)

**mitochondrial matrix** (GO:0005759) endoplasmic reticulum complex (GO:0006502)  
**organelle envelope** (GO:0031879) mitochondrial nucleoid (GO:0024646)  
**tubulin complex** (GO:0043268) integrin alpha-beta1 complex (GO:0034778) axon terminal (GO:0043444)

**mitochondrial membrane** (GO:0001966) muscle-specific microtubule (GO:1990488)  
**adhering junction** (GO:0050162) endoplasmic reticulum tubular network (GO:0017182)  
**alveolar lamellar body** (GO:0072708) proton-transporting ATP synthase complex (GO:0042529)

**postsynaptic synapse** (GO:0009534) succinate dehydrogenase complex (ubiquinol) (GO:0043525) integrin alpha-beta1 complex (GO:0034778)  
**region of cytosol** (GO:0099922) **extracellular matrix** (GO:0031012) cell-substrate adherens junction (GO:0050924)

**cell junction** (GO:0020024) sperm mitochondrion sheath (GO:0097232) smooth endoplasmic reticulum (GO:0005799)  
**mitochondrial crista** (GO:0030092) extrinsic component of mitochondrial outer membrane (GO:0031515) type II intermediate filament (GO:0045088)

**extracellular space** (GO:0005576) extrinsic component of plasma membrane (GO:0005083) podosome (GO:0026102)  
**vesicle** (GO:0031182) mitochondrial ribonucleoprotein P complex (GO:0000676) **extracellular exosome** (GO:0070062) **cytoplasm** (GO:0005822)

**TAF complex** (GO:0042826) **extracellular region part** (GO:0044421) proton-transporting ATP synthase complex, catalytic core F<sub>1</sub> (GO:0043561)  
**fusaric acid release complex** (GO:0043561) protein-conducting channel (GO:0005773) vesicular transport complex II (GO:0045273)

**integrin alpha11-beta1 complex** (GO:0034681) **zona pellucida receptor complex** (GO:0002119)  
**extracellular space** (GO:00055615) **chaperonin-containing T-complex** (GO:0005832) **cytoplasm** (GO:0005737)

**MIXO gene set** (GO:0071817) **myelin sheath** (GO:0043209) nucleocytoplasmic transport complex (GO:0031074)  
**nucleoid** (GO:0009295) proteasome core complex (GO:0005939)

**mitochondrial inner membrane** (GO:0005743) endoplasmic reticulum chaperone complex (GO:0034663) vacuolar lumen (GO:0005775)  
**microspike** (GO:0044335) integrin alpha1-beta1 complex (GO:0034480) mitochondrial respiratory chain complex II, succinate dehydrogenase complex (ubiquinol) (GO:0005748)

**strahl-type complex** (GO:0005240) mitochondrial proton-transporting ATP synthase complex, CF<sub>1</sub> (GO:0005778)  
**actin cap** (GO:0004478) integrin alpha1-beta1 complex (GO:0034665) **chaperone complex** (GO:0101031) lysosomal lumen (GO:0043202)

VCP-NESF1-like complex (GO:1990379) **extracellular organelle** (GO:0043230) MHC class I peptide loading complex (GO:0042824)  
**invadopodium** (GO:0071437) integrin alpha1-beta1 complex (GO:0034777) extrinsic component of lysosome membrane (GO:0032419)

**endoplasmic reticulum** (GO:0005782) **extracellular vesicle** (GO:1993561) **acidocalcisome** (GO:0005925)  
**outer mitochondrial membrane** (GO:0005741) mitochondrial permeability transition pore complex (GO:0005737) manchette (GO:0002177)

**organelle inner membrane** (GO:0018829) endoplasmic reticulum tubular network membrane (GO:0045826)  
**anchoring junction** (GO:0070161) extrinsic component of vacuolar membrane (GO:0003036) sperm fibrous shaft (GO:0035866)

**presynaptic synapse** (GO:0099523) integrin alpha1-beta1 complex (GO:0034777) Myo complex (GO:0031523)  
**mitochondrial part** (GO:0044429) succinate dehydrogenase complex (ubiquinol) (GO:0043525) RNA nuclear export complex (GO:0043565)

TRAP-CD171 complex (GO:0005779) **cell-substrate adherens junction** (GO:0050924)  
**peptidase domain** (GO:1990368) endothelial micrographia (GO:0072563)  
**intercalated disc** (GO:0014764) **extracellular vesicle** (GO:1993561) **acidocalcisome** (GO:0005925)  
**dense-core vesicle** (GO:0005740) NFK-kappaB complex (GO:0027159)  
**mitochondrial envelope** (GO:0005740) **testis chromatin** (GO:0005916)  
**pore complex** (GO:0046000) protein complex (GO:0043234) **ovule** (GO:0019712)

**dendrite** (GO:0030425) lamellipodium (GO:0030277)  
**neuron part** (GO:0097458) neuron projection (GO:0043005)  
**transport vesicle** (GO:0030133) endoplasmic reticulum complex (GO:0006502)  
**cell division site** (GO:0032151) cell division site (ctn) (GO:0031941)

**axon terminus** (GO:0043679) neuron projection terminus (GO:0043203)  
**SNARE complex** (GO:0031201) other organism part (GO:0044217)  
**mitochondrial nucleoid** (GO:0024646) proton-transporting two-sector ATPase complex (GO:0016489)

**dendritic tree** (GO:0097447) proton-transporting ATP synthase complex (GO:0045259)  
**intrinsically composed of synaptic vesicle membrane** (GO:0085653)

**other organism** (GO:0044215) **axon hillock** (GO:0043203)  
**excitatory synapse** (GO:0060076)

**intercellular bridge** (GO:0045171) amyloid-beta complex (GO:0106003)  
**cleavage furrow** (GO:0032154) **presynaptic active zone membrane** (GO:0048787)  
**terminal bouton** (GO:0043195)

**endoplasmic reticulum tubular network membrane** (GO:0098826)  
**exocytic vesicle** (GO:0070382) **SCAR complex** (GO:0031201) **axon** (GO:0030424)  
**mitochondrial part** (GO:0044429) **mitochondrion** (GO:0005739)

**blood microparticle** (GO:0072562) **zona pellucida receptor complex** (GO:0002199)  
**other organism cell** (GO:0044216) integral component of synaptic vesicle membrane (GO:0030285)

**stereocilium bundle** (GO:0032421) mitochondrial proton-transporting ATP synthase complex (GO:0005753)  
**endoplasmic reticulum lumen** (GO:0005788) endoplasmic reticulum tubular network (GO:0017182)  
**cell surface furrow** (GO:0097810) dense core granule (GO:0031045)

**cell projection part** (GO:0044463) presynaptic membrane (GO:0042734) nucleoid (GO:0009295)  
**axon part** (GO:0033267) plasma membrane bounded cell projection part (GO:0020038)  
**stereocilium** (GO:0032420) **cell division site part** (GO:0032155)

**cell surface** (GO:0009986) **cell-cell contact** (GO:0005961)  
**cell body** (GO:0044297) endomembrane system (GO:0012505)

**synapse** (GO:0045002)

**“exclusive”**

[illegible]

## Figure S6
