# Supplementary material for: A novel Microproteomic Approach Using Laser Capture Microdissection to Study Cellular Protrusions
Source: MDPI journal article supplement (doi:10.3390/ijms20051172), 2019-03-07
Supplement: s1 [file s1]

B

| UNIQUE hCAD TERMS                                         | hCAD IN 2 TERMS                                                 | EXCLUSIVE hCAD TERMS                                                 |
|-----------------------------------------------------------|-----------------------------------------------------------------|----------------------------------------------------------------------|
| intracellular organelle part (GO:0044446)                 | ribonucleoprotein complex (GO:1990904)                          | RZZ complex (GO:1990423)                                             |
| organelle part (GO:0044422)                               | intracellular ribonucleoprotein complex (GO:0030529)            | heteromeric SMAD protein complex (GO:0071144)                        |
| macromolecular complex (GO:0032991)                       | macromolecular complex (GO:0032991)                             | dendritic spine cytoplasm (GO:0061846)                               |
| intracellular organelle (GO:0043229)                      | intracellular organelle part (GO:0044446)                       | neuron projection branch point (GO:0061845)                          |
| membrane-bounded organelle (GO:0043227)                   | organelle part (GO:0044422)                                     | presynaptic cytosol (GO:0099523)                                     |
| intracellular part (GO:0044424)                           | extracellular exosome (GO:0070062)                              | striated muscle dense body (GO:0055120)                              |
| intracellular (GO:0005622)                                | extracellular vesicle (GO:1903561)                              | transcription factor TFIIIE complex (GO:0005673)                     |
| intracellular membrane-bounded organelle (GO:0043231)     | intracellular part (GO:0044424)                                 | nuclear pore transmembrane ring (GO:0070762)                         |
| ribonucleoprotein complex (GO:1990904)                    | extracellular organelle (GO:0043230)                            | DUBm complex (GO:0071819)                                            |
| intracellular ribonucleoprotein complex (GO:0030529)      | intracellular (GO:0005622)                                      | box H/ACA scaRNP complex (GO:0072589)                                |
| cytoplasm (GO:0005737)                                    | membrane-bounded organelle (GO:0043227)                         | transcription export complex 2 (GO:0070390)                          |
| nuclear part (GO:0044428)                                 | organelle (GO:0043226)                                          | mature chylomicron (GO:0034359)                                      |
| membrane-enclosed lumen (GO:0031974)                      | intracellular organelle (GO:0043229)                            | 3-methylcrotonyl-CoA carboxylase complex, mitochondrial (GO:0002169) |
| organelle lumen (GO:0043233)                              | cytoplasm (GO:0005737)                                          | THO complex part of transcription export complex (GO:0000445)        |
| intracellular organelle lumen (GO:0070013)                | protein complex (GO:0043234)                                    | THO complex (GO:0000347)                                             |
| cytoplasmic part (GO:0044444)                             | intracellular membrane-bounded organelle (GO:0043231)           | transcriptionally active chromatin (GO:0035327)                      |
| cell part (GO:0044464)                                    | nuclear part (GO:0044428)                                       | NELF complex (GO:0032021)                                            |
| cell (GO:0005623)                                         | intracellular organelle lumen (GO:0070013)                      | Ndc80 complex (GO:0031262)                                           |
| nucleus (GO:0005634)                                      | membrane-enclosed lumen (GO:0031974)                            | EARP complex (GO:1990745)                                            |
| protein complex (GO:0043234)                              | organelle lumen (GO:0043233)                                    | intracellular organelle (GO:0043229)                                 |
| nuclear lumen (GO:0031981)                                | cytosol (GO:0005829)                                            | nuclear part (GO:0044428)                                            |
| intracellular non-membrane-bounded organelle (GO:0043232) | cytoplasmic part (GO:0044444)                                   | transcription elongation factor complex (GO:0008023)                 |
| non-membrane-bounded organelle (GO:0043228)               | nucleus (GO:0005634)                                            | intracellular organelle part (GO:0044446)                            |
| cytosol (GO:0005829)                                      | nuclear lumen (GO:0031981)                                      | intracellular part (GO:0044424)                                      |
| extracellular exosome (GO:0070062)                        | endopeptidase complex (GO:1905369)                              | intracellular (GO:0005622)                                           |
| extracellular vesicle (GO:1903561)                        | intracellular non-membrane-bounded organelle (GO:0043232)       | organelle part (GO:0044422)                                          |
| extracellular organelle (GO:0043230)                      | non-membrane-bounded organelle (GO:0043228)                     | spliceosomal complex (GO:0005681)                                    |
| spliceosomal complex (GO:0005681)                         | cell part (GO:0044464)                                          | alpha DNA polymerase:primase complex (GO:0005658)                    |
| nucleoplasm (GO:0005654)                                  | cell (GO:0005623)                                               | SMAD protein complex (GO:0071141)                                    |
| nucleolus (GO:0005730)                                    | proteasome complex (GO:0000502)                                 | chromosome passenger complex (GO:0032133)                            |
| catalytic complex (GO:1902494)                            | vesicle (GO:0031982)                                            | transcription export complex (GO:0000346)                            |
| mitochondrion (GO:0005739)                                | myelin sheath (GO:0043209)                                      | intracellular membrane-bounded organelle (GO:0043231)                |
| vesicle (GO:0031982)                                      | spliceosomal complex (GO:0005681)                               | organelle (GO:0043226)                                               |
| organelle envelope (GO:0031967)                           | peptidase complex (GO:1905368)                                  | nuclear lumen (GO:0031981)                                           |
| envelope (GO:0031975)                                     | extracellular space (GO:0005615)                                | transcription factor TFIIC complex (GO:0000127)                      |
| preribosome (GO:0030684)                                  | extracellular region part (GO:0044421)                          | Pwp2p-containing subcomplex of 90S preribosome (GO:0034388)          |
| catalytic step 2 spliceosome (GO:0071013)                 | proteasome accessory complex (GO:0022624)                       | membrane-enclosed lumen (GO:0031974)                                 |
| mitochondrial part (GO:0044429)                           | nucleoplasm (GO:0005654)                                        | organelle lumen (GO:0043233)                                         |
| organelle membrane (GO:0031090)                           | proteasome regulatory particle (GO:0005838)                     | nuclear exosome (RNase complex) (GO:0000176)                         |
| chromosome (GO:0005694)                                   | nucleolus (GO:0005730)                                          | protein complex (GO:0043234)                                         |
| endopeptidase complex (GO:1905369)                        | focal adhesion (GO:0005925)                                     | membrane-bounded organelle (GO:0043227)                              |
| proteasome complex (GO:0000502)                           | cell-substrate adherens junction (GO:0005924)                   | intracellular organelle lumen (GO:0070013)                           |
| nuclear pore (GO:0005643)                                 | cell-substrate junction (GO:0030055)                            | chromosomal region (GO:0098687)                                      |
| membrane protein complex (GO:0098796)                     | catalytic complex (GO:1902494)                                  | exon-exon junction complex (GO:0035145)                              |
| spliceosomal snRNP complex (GO:0097525)                   | eukaryotic translation initiation factor 3 complex (GO:0005852) | nucleoplasm (GO:0005654)                                             |
| chromosomal part (GO:0044427)                             | extracellular region (GO:0005576)                               | nucleoplasm part (GO:0044451)                                        |
| Sm-like protein family complex (GO:0120114)               | aminoacyl-tRNA synthetase multienzyme complex (GO:0017101)      | nucleus (GO:0005634)                                                 |
| peptidase complex (GO:1905368)                            | catalytic step 2 spliceosome (GO:0071013)                       | catalytic complex (GO:1902494)                                       |
| small nuclear ribonucleoprotein complex (GO:0030532)      | mitochondrion (GO:0005739)                                      | cell part (GO:0044464)                                               |
| mitochondrial membrane (GO:0031966)                       | proteasome core complex (GO:0005839)                            | cell (GO:0005623)                                                    |

Figure S5
