# Supplementary material for: A novel Microproteomic Approach Using Laser Capture Microdissection to Study Cellular Protrusions
Source: MDPI journal article supplement (doi:10.3390/ijms20051172), 2019-03-07
Supplement: s1 [file s1]

A

| hCAD PROTRUSIONS: TOTAL UNIQUE PROTEINS (642) |          |          |            |          |          |          |          |         |          |  | hCAD PROTRUSIONS: "IN 2" (190) |          |         | hCAD PROTRUSIONS: "exclusive" (37) |           |
|-----------------------------------------------|----------|----------|------------|----------|----------|----------|----------|---------|----------|--|--------------------------------|----------|---------|------------------------------------|-----------|
| 2210010C04RIK                                 | C1QBP    | EEF1G    | GNAS       | KPNA4    | PABPC1   | PSMC1    | RPLP0    | SNRPD1  | UQCRC1   |  | AARS                           | HSPA4    | RPLP2   |                                    |           |
| 4930519F16RIK                                 | CACYBP   | EEF2     | GNB1       | KPNB1    | PABPC2   | PSMC2    | RPLP1    | SNRPD3  | UQCRC2   |  | ABCE1                          | HSPA5    | RPS10   |                                    | ARVCF     |
| A1E2B8                                        | CALCOCO1 | EIF2S1   | RACK1      | KRT90    | PABPN1   | PSMC3    | RPLP2    | SNRPE   | USO1     |  | ACAT1                          | HSPA8    | RPS12   |                                    | ASIC2     |
| AARS                                          | CALM1    | EIF2S3X  | GOT2       | L1CAM    | PAFAH1B2 | PSMC4    | RPN2     | SNU13   | VAC14    |  | ACLY                           | HSPA9    | RPS13   |                                    | ATP1A3    |
| ABCE1                                         | CAMK1G   | EIF3A    | GPI        | LAP3     | PAFAH1B3 | PSMC5    | RPS10    | SNX3    | VARS     |  | ACTB                           | HSPD1    | RPS16   |                                    | AU015228  |
| ACAA1A                                        | CAMK2D   | EIF3B    | GRK5       | LDHA     | PAICS    | PSMC6    | RPS11    | SOD2    | VAT1     |  | ACTG1                          | IL1RAPL1 | RPS17   |                                    | BC002059  |
| ACAT1                                         | CAND1    | EIF3C    | GRLF1      | LIG1     | PARP1    | PSMD1    | RPS12    | SPATA7  | VCL      |  | ACTN1                          | KARS     | RPS18   |                                    | CAMK1G    |
| ACLY                                          | CANX     | EIF3D    | GRPEL1     | LIN7C    | PCBP1    | PSMD11   | RPS13    | SPEN    | VCP      |  | ADRM1                          | KATNAL2  | RPS19   |                                    | DMXL1     |
| ACQ2                                          | CAP1     | EIF3E    | GSDMA3     | LMNA     | PCBP2    | PSMD12   | RPS14    | SPTAN1  | VDAC1    |  | AKR1B1                         | KPNA2    | RPS2    |                                    | E2F4      |
| ACOT7                                         | CAPRIN1  | EIF3F    | GSTP1      | LRPPRC   | PCBP3    | PSMD2    | RPS15    | SPTBN1  | VDAC2    |  | ALB                            | KPNB1    | RPS23   |                                    | EIF3J2    |
| ACTB                                          | CAPZA2   | EIF3G    | H2AFX      | LRRCS9   | PCDHGC4  | PSMD3    | RPS15A   | SRM     | VDAC3    |  | ALDOA                          | LDHA     | RPS24   |                                    | ESCO1     |
| ACTG1                                         | CARS     | EIF3J2   | H3F3A      | LUC7L2   | PCNA     | PSMD5    | RPS16    | SRSF10  | VG       |  | ANXA2                          | MAP1B    | RPS25   |                                    | FAM160A2  |
| ACTN1                                         | CCDC124  | EIF3L    | HADH       | LYZ1     | PDAP1    | PSMD7    | RPS17    | SRSF3   | VIM      |  | APRT                           | MAT2B    | RPS28   |                                    | FAM171A2  |
| ACTR1A                                        | CCT2     | EIF3M    | HARS       | MAP1B    | PDCD5    | PSME3    | RPS18    | SSB     | VKORC1L1 |  | ARPC4                          | MDH1     | RPS3    |                                    | FLT4      |
| ACTR1B                                        | CCT3     | EIF4A1   | HDAC6      | MAP1LC3B | PDCD6IP  | PSPH     | RPS19    | SSR1    | VMN2R66  |  | ASL                            | MDH2     | RPS3A   |                                    | GAPDH5    |
| ACTR2                                         | CCT4     | EIF4H    | HIST1H1A   | MARCKSL1 | PDIA3    | PTBP1    | RPS2     | SSR4    | VPS35    |  | ASNS                           | MYL6     | RPS4X   |                                    | GM10126   |
| ACTR3                                         | CCT5     | EIF5     | HIST1H1B   | MARS     | PDIA6    | PTPRD    | RPS20    | ST13    | XPENPE1  |  | ATPSA1                         | NACA     | RPS5    |                                    | GM10610   |
| ADRM1                                         | CCT6A    | EIF5A    | HIST1H1C   | MAT2A    | PDXP     | PYM1     | RPS21    | STIP1   | XPO5     |  | ATPSB                          | NCAM1    | RPS7    |                                    | GM6583    |
| AKAP12                                        | CCT7     | EIF6     | HIST1H1E   | MAT2B    | PEBP1    | Q505R5   | RPS23    | STMN1   | YARS     |  | ATP6V1A                        | NCL      | RPS8    |                                    | GRK5      |
| AKR1B1                                        | CCT8     | ELAVL1   | HIST1H2AF  | MATR3    | PES1     | Q80Y73   | RPS24    | STMN2   | YBX1     |  | BTF3                           | NME1     | RPS9    |                                    | GRLF1     |
| ALAD                                          | CD47     | ELAVL2   | HIST1H2BB  | MCM2     | PFDN1    | Q8VEQ0   | RPS25    | STOML2  | YBX2     |  | C1QBP                          | NPM1     | RPSA    |                                    | GSDMA3    |
| ALB                                           | CDC42    | ELAVL4   | HIST1H2BF  | MCM3     | PFDN2    | Q9CQE8   | RPS26    | SUPT6H  | YBX3     |  | CAPRIN1                        | NSFL1C   | SERBP1  |                                    | HIST1H2BP |
| ALDH9A1                                       | CFL1     | ELMO2    | HIST1H2BP  | MCM4     | PFDN4    | RAB11A   | RPS27L   | SYN2    | YME1L1   |  | CAPZA2                         | OLA1     | SET     |                                    | KATNA1    |
| ALDOA                                         | CHCHD2   | EMB      | HIST1H3B   | MCM5     | PFDN5    | RAB1A    | RPS28    | SYNCRIP | YWHA     |  | CCT2                           | PCBP2    | SHMT2   |                                    | KDEL2C    |
| ANXA2                                         | CHGB     | ENO1     | HIST1H4A   | MCM6     | PFDN6    | RAB2A    | RPS3     | SYTL4   | YWHA     |  | CCT3                           | PCBP3    | SLC25A3 |                                    | PABPC2    |
| ANXA6                                         | CHMP4B   | EPRS     | HIST2H2AA1 | MCM7     | PFN1     | RAB5C    | RPS3A    | TAGLN2  | YWHA     |  | CCT4                           | PDAP1    | SLC25A5 |                                    | PTPRD     |
| AP1B1                                         | CKAP4    | ESCO1    | HIST2H2AC  | MDH1     | PGAM1    | RAB7A    | RPS4X    | TALDO1  | YWHA     |  | CCT5                           | PDIA3    | SLC3A2  |                                    | Q505R5    |
| APRT                                          | CLIC1    | ESYT1    | HMBG2      | MDH2     | PGD      | RAB8B    | RPS5     | TARDBP  | YWHA     |  | CCT6A                          | PDIA6    | SNRPD3  |                                    | Q8VEQ0    |
| ARF1                                          | CLTC     | ETF1     | HNRNPA1    | ME1      | PGK1     | RAC2     | RPS6     | TCP1    | ZFP606   |  | CCT8                           | PFDN2    | SPEN    |                                    | RAB8B     |
| ARHGDI                                        | CNN3     | EXOSC2   | HNRNPA2B1  | MEST     | PGLS     | RAN      | RPS7     | TENM2   | ZPR1     |  | CFL1                           | PFN1     | SPTAN1  |                                    | RAC2      |
| ARL2                                          | COPG1    | EZR      | HNRNPAB    | METAP2   | PHB      | RANBP1   | RPS8     | TFRC    |          |  | CLTC                           | PGAM1    | SRM     |                                    | RPL32-P5  |
| ARL3                                          | COP3     | FAM160A2 | HNRNPC     | MIF      | PHB2     | RANGAP1  | RPS9     | THOP1   |          |  | CORO1C                         | PHB2     | ST13    |                                    | SHANK2    |
| ARPC4                                         | COP57A   | FAM171A2 | HNRNP      | MSN      | PHGDH    | RAP1A    | RPSA     | TIMM13  |          |  | DDX39B                         | PKM      | STIP1   |                                    | SKINT5    |
| ARPC5                                         | CORO1C   | FAM49B   | HNRNPF     | MTCO2    | PITPNA   | RARS     | RSU1     | TIMM23  |          |  | DDX3X                          | PPIA     | SYNCRIP |                                    | TENM2     |
| ARVCF                                         | COX5A    | FARSA    | HNRNPH1    | MTHFD1   | PKM      | RBM3     | RTN4     | TIMM50  |          |  | DPYSL3                         | PPP1CA   | TAGLN2  |                                    | TLR12     |
| ASIC2                                         | CRIP2    | FARSB    | HNRNPH3    | MTHFD1L  | POLR2H   | RBMX     | RUVBL1   | TKT     |          |  | DSP                            | PRDX1    | TKT     |                                    | TMCC2     |
| ASL                                           | CS       | FASN     | HNRNPK     | MTHFD2   | PPIA     | RCC2     | RUVBL2   | TLN1    |          |  | EEF1A1                         | PRDX2    | TPI1    |                                    | YBX2      |
| ASNA1                                         | CSDE1    | FAU      | HNRNPM     | MYB8P1A  | PPIB     | RMDN3    | SARNP    | TLR12   |          |  | EEF1A2                         | PRDX4    | TRAP1   |                                    | ZFP606    |
| ASNS                                          | CSE1L    | FDP5     | HNRNPR     | MYH10    | PPID     | RNF181   | SARS     | TMCC2   |          |  | EEF1D                          | PRKCA    | TUBA1A  |                                    |           |
| ASS1                                          | CSNK2A1  | FDXR     | HNRNPU     | MYH9     | PPP1CA   | RPA1     | SCARB2   | TMEM33  |          |  | EEF1G                          | PRPH     | TUBA1B  |                                    |           |
| AT1C                                          | CYBSR3   | FH       | HSD17B10   | MYL12B   | PPP1CB   | RPA3     | SCRIB    | TOMM22  |          |  | EEF2                           | PSAT1    | TUBB3   |                                    |           |
| ATL2                                          | DAZAP1   | FIS1     | HSP90AA1   | MYL6     | PPP2R1A  | RPAP1    | SDHA     | TOMM34  |          |  | EIF2S1                         | PSMA5    | TUBB4B  |                                    |           |
| ATP1A1                                        | DCTN2    | FLNA     | HSP90AB1   | NAA25    | PP5C     | RPL10A   | SEPT11   | TOP2A   |          |  | EIF3B                          | PSMA6    | TUBB5   |                                    |           |
| ATP1A3                                        | DDOST    | FLT4     | HSP90B1    | NACA     | PRDX1    | RPL10L   | SERBP1   | TPI1    |          |  | EIF4A1                         | PSMA7    | UBA1    |                                    |           |
| ATPSA1                                        | DDX1     | FMN1     | HSPA1L     | NAF1     | PRDX2    | RPL11    | SET      | TPM3    |          |  | EIF4H                          | PTBP1    | UBA52   |                                    |           |
| ATPSB                                         | DDX39B   | FNR1     | HSPA4      | NAP1L1   | PRDX3    | RPL12    | SETX     | TPPP3   |          |  | ELAVL1                         | RAB7A    | UQCRC2  |                                    |           |
| ATPSD                                         | DDX3X    | FSCN1    | HSPA5      | NARS     | PRDX4    | RPL13    | SF3A3    | TPR     |          |  | EMB                            | RAN      | VCP     |                                    |           |
| ATPSF1                                        | DDX47    | FTL1     | HSPA8      | NCAM1    | PRDX6    | RPL14    | SF3B1    | TRAP1   |          |  | ENO1                           | RANBP1   | VDAC1   |                                    |           |
| ATPSH                                         | DDX5     | FUS      | HSPA9      | NCAPG    | PREP     | RPL15    | SH3D21   | TRIM28  |          |  | ETF1                           | RAP1A    | VDAC3   |                                    |           |
| ATPSJ2                                        | DDX6     | G3BP1    | HSPD1      | NCL      | PRKACA   | RPL18    | SHANK2   | TRIP13  |          |  | FASN                           | RBM3     | VG      |                                    |           |
| ATPSO                                         | DERL1    | G3BP2    | HSPE1      | NLRP4C   | PRKACB   | RPL22    | SHMT2    | TRMT112 |          |  | FLNA                           | RBMX     | VIM     |                                    |           |
| ATP6VOA1                                      | DHX15    | G6PDX    | HSPH1      | NME1     | PRPH     | RPL23    | SIK3     | TRY10   |          |  | FN1                            | RPAP1    | YWHA    |                                    |           |
| ATP6V1A                                       | DHX9     | GAK      | HYOU1      | NMT1     | PRPS1    | RPL23A   | SKINT5   | TTN     |          |  | FSCN1                          | RPL10A   | YWHA    |                                    |           |
| ATP6V1E1                                      | DKC1     | GANAB    | IL1RAPL1   | NOLC1    | PRPSAP1  | RPL24    | SLC1A4   | TUBA1A  |          |  | G3BP1                          | RPL11    | YWHA    |                                    |           |
| ATP6V1G1                                      | DLAT     | GAPDH    | ILF2       | NONO     | PRPSAP2  | RPL27    | SLC1A5   | TUBA1B  |          |  | GAPDH                          | RPL12    |         |                                    |           |
| ATP6V1H                                       | DMXL1    | GAPDH5   | ILF3       | NOP56    | PSAT1    | RPL27A   | SLC25A10 | TUBB2A  |          |  | GDI2                           | RPL13    |         |                                    |           |
| ATXN10                                        | DNMT3A   | GARS     | IPO5       | NPM1     | PSMA2    | RPL30    | SLC25A12 | TUBB2B  |          |  | GOT2                           | RPL14    |         |                                    |           |
| AU015228                                      | DPY30    | GCH1     | IPO7       | NPM3     | PSMA3    | RPL31    | SLC25A3  | TUBB3   |          |  | HIST1H1A                       | RPL18    |         |                                    |           |
| BAG6                                          | DPYSL2   | GDI2     | IQGAP1     | NQO1     | PSMA4    | RPL32-PS | SLC25A4  | TUBB4B  |          |  | HIST1H2AF                      | RPL23    |         |                                    |           |
| BANF1                                         | DPYSL3   | GMF1     | ITGB1      | NSFL1C   | PSMA5    | RPL34    | SLC25A5  | TUBB5   |          |  | HIST1H4A                       | RPL27A   |         |                                    |           |
| BASP1                                         | DSP      | GID3     | JUP        | NSUN2    | PSMA6    | RPL35    | SLC2A3   | TUFM    |          |  | HNRNPA2B1                      | RPL30    |         |                                    |           |
| BAX                                           | DSTN     | GLMN     | KARS       | NUDC     | PSMA7    | RPL38    | SLC3A2   | TXNRD1  |          |  | HNRNPAB                        | RPL31    |         |                                    |           |
| BAZ1B                                         | DYNC1H1  | GLRX3    | KATNA1     | NUP133   | PSMB1    | RPL4     | SNAP23   | UBA1    |          |  | HNRNPD                         | RPL35    |         |                                    |           |
| BC002059                                      | E2F4     | GM10126  | KATNAL2    | OAT      | PSMB2    | RPL5     | SNAP25   | UBA52   |          |  | HNRNPK                         | RPL4     |         |                                    |           |
| BC094435                                      | EEF1A1   | GM10610  | KCNAB2     | OGDH     | PSMB3    | RPL6     | SND1     | UBAP2L  |          |  | HNRNPU                         | RPL5     |         |                                    |           |
| BRE                                           | EEF1A2   | GM5409   | KDEL2      | OLA1     | PSMB5    | RPL7     | SNRNP200 | UBE2D3  |          |  | HSP90AA1                       | RPL7     |         |                                    |           |
| BTF3                                          | EEF1B    | GM5771   | KIF4       | P4HB     | PSMB6    | RPL7A    | SNRPA    | UBQLN2  |          |  | HSP90AB1                       | RPL9     |         |                                    |           |
| BZW2                                          | EEF1D    | GM6583   | KPNA2      | PA2G4    | PSMB7    | RPL9     | SNRPB    | UMPS    |          |  | HSP90B1                        | RPLP0    |         |                                    |           |

Figure S4
