# Supplementary material for: A novel Microproteomic Approach Using Laser Capture Microdissection to Study Cellular Protrusions
Source: MDPI journal article supplement (doi:10.3390/ijms20051172), 2019-03-07
Supplement: s1 [file s1]

A novel microproteomic approach using laser capture microdissection to study cellular protrusions

Karine Gousset \*, Ana Gordon, Shravan Kumar Kannan and Joey Tovar

**Supplementary Materials:** includes 6 supplementary figures and legends
