# Supplementary material for: A novel Microproteomic Approach Using Laser Capture Microdissection to Study Cellular Protrusions
Source: MDPI journal article supplement (doi:10.3390/ijms20051172), 2019-03-07
Supplement: s1 [file s1]

B

| dCAD PROTRUSIONS: TOTAL UNIQUE PROTEINS (756) |          |           |         |           |          |          |        |         |          |          | dCAD PROTRUSIONS: "IN 2" (139) |          |         | dCAD PROTRUSIONS: "exclusive" (38) |            |
|-----------------------------------------------|----------|-----------|---------|-----------|----------|----------|--------|---------|----------|----------|--------------------------------|----------|---------|------------------------------------|------------|
| 4930550L24RIK                                 | AT1C     | CHCHD3    | EIF3B   | GRPEL1    | LAMTOR1  | P4HB     | PRKCSH | RPL13A  | SEPT7    | TLN1     | YKT6                           | ACLY     | NAP1L1  | VIM                                | AOA097PUH2 |
| AOA097PUG4                                    | ATL3     | CHGB      | EIF3F   | GSN       | LAP3     | PA2G4    | PRMT1  | RPL14   | SEPT9    | TMEM120A | YWHAB                          | ACTB     | P4HB    | YWHAH                              | AFDN       |
| AOA097PUH2                                    | ATP1A1   | CHMP4B    | EIF3L   | GSR       | LAPTM5   | PABPC1   | PRNP   | RPL18   | SERBP1   | TMEM33   | YWHAE                          | ACTG1    | PDIA3   | YWHAZ                              | AFDN       |
| A2M                                           | ATP1B1   | CLIC1     | EIF4A1  | GSTM1     | LASP1    | PABPN1   | PRPF19 | RPL22   | SERPINC1 | TMX1     | YWHAG                          | ACTN1    | PDIA6   |                                    | AFM        |
| AARS                                          | ATP2A2   | CLPP      | EIF4A2  | GSTP1     | LDHA     | PAFAH1B1 | PRPH   | RPL23   | SERPINF1 | TMX4     | YWHAH                          | ACTR1A   | PFN1    |                                    | AHSG       |
| ABCE1                                         | ATP2B1   | CLPTM1    | EIF4B   | H2AFJ     | LGALS1   | PAFAH1B2 | PRR27  | RPL23A  | SETX     | TNPO1    | YWHAQ                          | ALB      | PGAM1   |                                    | ATP1F1     |
| ACAA2                                         | ATP5A1   | CLTC      | EIF4H   | H3F3C     | LIN7C    | PAFAH1B3 | PSAT1  | RPL3    | SF3B3    | TOMM70A  | YWHAZ                          | ALDOA    | PHB     |                                    | BRK1       |
| ACAT1                                         | ATP5B    | CNBP      | ELAVL1  | HADH      | LNP      | PAICS    | PSMA1  | RPL30   | SH3D21   | TPD52    | ZYX                            | ANXA2    | PHB2    |                                    | C4B        |
| ACAT2                                         | ATP5C1   | COPG1     | EMB     | HARS      | LONP1    | PALLD    | PSMA2  | RPL35   | SH3GLB2  | TP11     |                                | ANXA5    | PHGDH   |                                    | CCR9       |
| ACLY                                          | ATP5D    | COP53     | EMD     | HBB-Y     | LRPPRC   | PARK7    | PSMA3  | RPL38   | SHMT2    | TPM1     |                                | APRT     | PKM     |                                    | CERS5      |
| ACO2                                          | ATP5E    | COP54     | ENAH    | HGFAC     | LRRC40   | PC       | PSMA4  | RPL4    | SIK3     | TPM3     |                                | ARHGDI1A | PIIA    |                                    | DPYSL3     |
| ACOT2                                         | ATP5F1   | CORO1C    | ENO1    | HINT1     | LRRC47   | PCBP1    | PSMA5  | RPL5    | SLC12A9  | TPM4     |                                | ARPC4    | PRDX1   |                                    | FASTKD2    |
| ACOT7                                         | ATP5H    | COX4I1    | EPHX1   | HIST1H2AF | LRRC59   | PCBP2    | PSMA6  | RPL6    | SLC16A1  | TPPP3    |                                | ASL      | PRDX2   |                                    | FLG2       |
| ACTB                                          | ATP5J2   | COX5A     | EPRS    | HIST1H2BB | LSS      | PCBP3    | PSMA7  | RPL7    | SLC1A5   | TRAP1    |                                | ATP5A1   | PRDX4   |                                    | GM11214    |
| ACTG1                                         | ATP5L    | COX6C     | ERLIN2  | HIST1H2BF | LTA4H    | PCDHGC4  | PSMB1  | RPL7A   | SLC25A1  | TRDMT1   |                                | ATP5B    | PSAT1   |                                    | GM15013    |
| ACTN1                                         | ATP5O    | CPNE1     | ERMP1   | HIST1H4A  | LYZ1     | PCK2     | PSMB2  | RPL8    | SLC25A11 | TRMT112  |                                | ATP5O    | PSMA5   |                                    | H3F3C      |
| ACTN4                                         | ATP6V0A1 | CTP1A     | ERP29   | HK1       | MANF     | PCMT1    | PSMB3  | RPL9    | SLC25A12 | TRPV2    |                                | C1QBP    | PSMA6   |                                    | HGFAC      |
| ACTR1A                                        | ATP6V0D1 | CRIP2     | ESYT1   | HMG2      | MAP1A    | PDAP1    | PSMB4  | RPLP0   | SLC25A3  | TRY10    |                                | CALM1    | PSMA7   |                                    | HSPA1B     |
| ACTR1B                                        | ATP6V1A  | CRMP1     | ETF1    | HMG2      | MAP1B    | PCD5     | PSMB5  | RPLP1   | SLC25A4  | TSTA3    |                                | CAND1    | PSMB1   |                                    | ITIH1      |
| ACTR2                                         | ATP6V1B2 | CS        | ETFA    | HMOX2     | MAP1LC3B | PDCD6IP  | PSMB6  | RPLP2   | SLC25A5  | TUBA1A   |                                | CANX     | PSMB2   |                                    | ITIH4      |
| ACTR3                                         | ATP6V1C1 | CNK2B     | ETFB    | HNRNPA1   | MAP15    | PDHB     | PSMC1  | RPN1    | SLC27A1  | TUBA1B   |                                | CAPZA1   | PSMD12  |                                    | KCNMA1     |
| ACTR3B                                        | ATP6V1D  | CTSB      | EXOC8   | HNRNPA2B1 | MAP4     | PDIA3    | PSMC2  | RPN2    | SLC2A3   | TUBA8    |                                | CCT2     | RAB10   |                                    | KDEL1      |
| ADPGK                                         | ATP6V1E1 | CTSD      | FAM129A | HNRNPAB   | MAPK1    | PDIA4    | PSMC6  | RPS10   | SLC39A7  | TUBB2A   |                                | CCT3     | RAB14   |                                    | KLK8       |
| ADSL                                          | ATP6V1G1 | CTTN      | FARSA   | HNRNPD    | MAPK3    | PDIA6    | PSMD1  | RPS11   | SLC3A2   | TUBB2B   |                                | CCT5     | RAB7A   |                                    | KRT90      |
| AFDN                                          | ATP6V1H  | CYB5B     | FASN    | HNRNPK    | MAPRE1   | PDXP     | PSMD11 | RPS12   | SNAP25   | TUBB3    |                                | CCT6A    | RAN     |                                    | LAPTM5     |
| AFM                                           | ATP1F1   | CYB5R1    | FASTKD2 | HPCA      | MARCKSL1 | PEBP1    | PSMD12 | RPS13   | SNCG     | TUBB4B   |                                | CCT8     | RPL12   |                                    | LNP        |
| AHCY                                          | ATXN10   | CYB5R3    | FOX2    | HSD17B10  | MAT2A    | PEPD     | PSMD14 | RPS14   | SND1     | TUBB5    |                                | CFL1     | RPLP0   |                                    | OXNAD1     |
| AHLYL1                                        | BAG3     | CYC1      | FH      | HSD17B12  | MAT2B    | PFDN1    | PSMD2  | RPS15A  | SNRPD1   | TUBB6    |                                | CLTC     | RPLP2   |                                    | PRNP       |
| AHNAK                                         | BASP1    | CYC5      | FIS1    | HSD17B7   | MBLAC2   | PFDN2    | PSMD4  | RPS16   | SNRPD3   | TUFM     |                                | CORO1C   | RPN2    |                                    | PRR27      |
| AHSG                                          | BAX      | D10JHU81E | FKBP1A  | HSP90AA1  | MDH1     | PFDN6    | PSMD7  | RPS17   | SNX2     | TXNDC5   |                                | CS       | RPS12   |                                    | PYCR1      |
| AIP                                           | BRK1     | DAD1      | FKBP2   | HSP90AB1  | MDH2     | PKFL     | PSPH   | RPS18   | SNX25    | UBA1     |                                | CYB5R3   | RPS16   |                                    | RHOC       |
| AK2                                           | BSG      | DARS      | FKBP4   | HSP90B1   | ME1      | PKFK     | PTK7   | RPS19   | SNX3     | UBA52    |                                | DPYSL2   | RPS17   |                                    | S100A11    |
| AKAP12                                        | BZW2     | DBI       | FKBP8   | HSPA1B    | MIF      | PFN1     | PTRH2  | RPS2    | SNX5     | UBE2D3   |                                | DSP      | RPS23   |                                    | SERPINF1   |
| AKR1B1                                        | C1QBP    | DBNL      | FLG2    | HSPA4     | MROH6    | PGAM1    | PYCR2  | RPS20   | SOD1     | UBE2N    |                                | EEF1A1   | RPS25   |                                    | SNX25      |
| ALB                                           | C3       | DCAKD     | FLNA    | HSPA5     | MSN      | PGD      | PYCR1  | RPS21   | SOD2     | UBE2V1   |                                | EEF2     | RPS28   |                                    | SPRY1      |
| ALDH18A1                                      | C4B      | DCLK1     | FLNB    | HSPA8     | MTCO2    | PGK1     | QDPR   | RPS23   | SPATA7   | UBXN1    |                                | EIF3F    | RPS3    |                                    | SYT1       |
| ALDH112                                       | CACYBP   | DCTN2     | FLNC    | HSPA9     | MTHFD1L  | PGLS     | RAB10  | RPS24   | SPR      | UCHL1    |                                | ENO1     | RPS8    |                                    | TRDMT1     |
| ALDH2                                         | CAD      | DDOST     | FN1     | HSPD1     | MTHFD2   | PGRMC1   | RAB11B | RPS25   | SPRY1    | UGGT1    |                                | FASN     | RPS9    |                                    | VMA21      |
| ALDH9A1                                       | CALCOCO1 | DDX39B    | FSCN1   | HSPE1     | MYDGF    | PGRMC2   | RAB14  | RPS27L  | SPTAN1   | UQCRR    |                                | FLNB     | RPSA    |                                    | WDR64      |
| ALDOA                                         | CALM1    | DDX3X     | G6PDX   | HSPH1     | MYG1     | PHB      | RAB1A  | RPS28   | SPTBN1   | UQCRC1   |                                | FN1      | RTN4    |                                    |            |
| ALDOC                                         | CALR     | DEC1      | GAK     | HYOU1     | MYH10    | PHB2     | RAB1B  | RPS29   | SRM      | UQCRC2   |                                | FSCN1    | SARS    |                                    |            |
| ALG2                                          | CALU     | DERL1     | GALK1   | IARS      | MYH14    | PHGDH    | RAB21  | RPS3    | SRP14    | UQCRCQ   |                                | GAPDH    | SCARB2  |                                    |            |
| ANXA2                                         | CAMK2D   | DHRS1     | GANAB   | IDH2      | MYH9     | PICALM   | RAB2A  | RPS3A   | SSR4     | USP5     |                                | GDI1     | SDHA    |                                    |            |
| ANXA4                                         | CAND1    | DLAT      | GAP43   | IDH3A     | MYL12B   | PIN4     | RAB5A  | RPS4X   | ST13     | USP9X    |                                | GOT2     | SHMT2   |                                    |            |
| ANXA5                                         | CANX     | DLG       | GAPDH   | IDH3B     | MYL6     | PKM      | RAB5C  | RPS5    | STIP1    | VAMP2    |                                | GSN      | SLC1A5  |                                    |            |
| ANXA6                                         | CAP1     | DLST      | GARS    | IL1RAPL1  | NACA     | PLEC     | RAB6A  | RPS6    | STMN1    | VAMP3    |                                | GSTP1    | SLC25A3 |                                    |            |
| AP2A2                                         | CAPZA1   | DNAJA1    | GBA     | IMPA1     | NAF1     | PLIN3    | RAB7A  | RPS7    | STMN2    | VAPB     |                                | HINT1    | SLC25A4 |                                    |            |
| AP2B1                                         | CAPZA2   | DNAJC11   | GCLM    | INA       | NAP1L1   | PLOD3    | RAC1   | RPS8    | STOM     | VARS     |                                | HIST1H4A | SLC25A5 |                                    |            |
| AP2M1                                         | CAPZB    | DNPEP     | GDI1    | INS1      | NAPA     | PMM2     | RACK1  | RPS9    | STOML2   | VAT1     |                                | HSD17B10 | SLC3A2  |                                    |            |
| APMAP                                         | CARS     | DPYSL2    | GDI2    | IQGAP1    | NARS     | PMVK     | RAN    | RPSA    | STRAP    | VAT1L    |                                | HSP90AA1 | TARS    |                                    |            |
| APRT                                          | CAT      | DPYSL3    | GJD3    | ISOC1     | NCAM1    | POR      | RANBP1 | RTN4    | STRN3    | VBP1     |                                | HSP90AB1 | TCP1    |                                    |            |
| ARF1                                          | CBR1     | DPYSL5    | GLIPR2  | ITGB1     | NDUFA4   | PIIA     | RAP1B  | RUVBL1  | STX12    | VCP      |                                | HSP90B1  | TP11    |                                    |            |
| ARF4                                          | CCDC115  | DRG2      | GLUD1   | ITIH1     | NEFH     | PIIB     | RARS   | S100A11 | STX7     | VCP1P1   |                                | HSPA5    | TRAP1   |                                    |            |
| ARF5                                          | CCDC124  | DSP       | GM11214 | ITIH2     | NLE1     | PPID     | RBM14  | S100A6  | STXBP1   | VDAC1    |                                | HSPA8    | TRY10   |                                    |            |
| ARG1                                          | CCR9     | DSTN      | GM11639 | ITIH3     | NME1     | PPP1CA   | RBM3   | SACM1L  | SUCLG1   | VDAC2    |                                | HSPA9    | TUBA1A  |                                    |            |
| ARHGDI1A                                      | CCT2     | DYNLC1H1  | GM15013 | ITIH4     | NME2     | PPP1CB   | RCN2   | SAR1A   | SUCLG2   | VDAC3    |                                | HSPD1    | TUBB2A  |                                    |            |
| ARL3                                          | CCT3     | DYNLT1    | GM20425 | JUP       | NMT1     | PPP2R1A  | RDH11  | SARNP   | SYN1     | VGF      |                                | HSPE1    | TUBB3   |                                    |            |
| ARL6IP5                                       | CCT4     | ECH1      | GM43738 | KATNAL2   | NPTN     | PPP2R2A  | RDX    | SARS    | SYNCRIP  | VIM      |                                | HYOU1    | TUBB4B  |                                    |            |
| ARL8A                                         | CCT5     | ECHS1     | GM5771  | KCNMA1    | NQO1     | PPP5C    | REEP5  | SCARB2  | SYT1     | VMA21    |                                | ITGB1    | TUBB5   |                                    |            |
| ARL8B                                         | CCT6A    | EEF1A1    | GNA11   | KDEL1     | NRAS     | PRAF2    | RHEB   | SCCPDH  | SYTL4    | VMN2R66  |                                | JUP      | UBA1    |                                    |            |
| ARPC1B                                        | CCT7     | EEF1A2    | GNA13   | KIAA0391  | NSDHL    | PRDX1    | RHOA   | SCFD1   | TAGLN2   | VPS16    |                                | KPNB1    | UBA52   |                                    |            |
| ARPC2                                         | CCT8     | EEF1B     | GNAI2   | KIF5B     | NSF      | PRDX2    | RHOC   | SDHA    | TARS     | VPS26A   |                                | LDHA     | VAT1    |                                    |            |
| ARPC4                                         | CD47     | EEF1D     | GNAO1   | KLC4      | NSFL1C   | PRDX3    | RNF181 | SEC22B  | TBCA     | VPS35    |                                | LGALS1   | VAT1L   |                                    |            |
| ARPC5                                         | CD42     | EEF1G     | GNB1    | KLK8      | NUDC     | PRDX4    | RPAP1  | SEC61A2 | TCP1     | VPS4A    |                                | MAP1B    | VCP     |                                    |            |
| ASL                                           | CDK1     | EEF2      | GNB2    | KPNB1     | OGDH     | PRDX6    | RPL10A | SEC61B  | TECR     | WDR1     |                                | MDH1     | VDAC1   |                                    |            |
| ASNA1                                         | CERS5    | EIF1AX    | GOT2    | KRT90     | OLA1     | PREP     | RPL11  | SEC63   | TFR      | WDR64    |                                | MDH2     | VDAC2   |                                    |            |
| ASNS                                          | CFL1     | EIF251    | GPI     | L1CAM     | OXC1     | PRKACA   | RPL12  | SEPT11  | TIMM50   | XPINPEP1 |                                | MSN      | VDAC3   |                                    |            |
| ASS1                                          | CHCHD2   | EIF253X   | GRK6    | LAMP1     | OXNAD1   | PRKAR1A  | RPL13  | SEPT2   | TKT      | YARS     |                                | MYL6     | VGF     |                                    |            |

Figure S4
