# Supplementary material for: A novel Microproteomic Approach Using Laser Capture Microdissection to Study Cellular Protrusions
Source: MDPI journal article supplement (doi:10.3390/ijms20051172), 2019-03-07
Supplement: s1 [file s1]

D

| UNIQUE hCAD PROTRUSION TERMS                                           | hCAD PROTRUSION IN 2 TERMS                                                               | EXCLUSIVE hCAD PROTRUSION TERMS                                       |
|------------------------------------------------------------------------|------------------------------------------------------------------------------------------|-----------------------------------------------------------------------|
| myelin sheath (GO:0043209)                                             | cytosolic ribosome (GO:0022626)                                                          | calcium- and calmodulin-dependent protein kinase complex (GO:0005954) |
| extracellular exosome (GO:0070062)                                     | myelin sheath (GO:0043209)                                                               | RAVE complex (GO:0043291)                                             |
| extracellular vesicle (GO:1903561)                                     | cytosolic small ribosomal subunit (GO:0022627)                                           | FHF complex (GO:0070695)                                              |
| extracellular organelle (GO:0043230)                                   | cytosolic part (GO:0044445)                                                              | dendritic spine neck (GO:0044326)                                     |
| ribonucleoprotein complex (GO:1990904)                                 | chaperonin-containing T-complex (GO:0005832)                                             | sodium:potassium-exchanging ATPase complex (GO:0005890)               |
| intracellular ribonucleoprotein complex (GO:0030529)                   | ribosomal subunit (GO:0044391)                                                           | neurofilament (GO:0005883)                                            |
| cytosolic part (GO:0044445)                                            | chaperone complex (GO:0101031)                                                           | cell tip (GO:0051286)                                                 |
| cytosolic ribosome (GO:0022626)                                        | ribosome (GO:0005840)                                                                    | cation-transporting ATPase complex (GO:0090533)                       |
| proteasome complex (GO:0000502)                                        | zona pellucida receptor complex (GO:0002199)                                             | dendritic spine head (GO:0044327)                                     |
| eukaryotic translation initiation factor 3 complex (GO:0005852)        | small ribosomal subunit (GO:0015935)                                                     | ATPase dependent transmembrane transport complex (GO:0098533)         |
| endopeptidase complex (GO:1905369)                                     | cytosolic large ribosomal subunit (GO:0022625)                                           | sperm fibrous sheath (GO:0035686)                                     |
| vesicle (GO:0031982)                                                   | extracellular exosome (GO:0070062)                                                       | eukaryotic translation initiation factor 3 complex (GO:0005852)       |
| focal adhesion (GO:0005925)                                            | extracellular vesicle (GO:1903561)                                                       | dendritic spine (GO:0043197)                                          |
| extracellular space (GO:0005615)                                       | extracellular organelle (GO:0043230)                                                     | neuron spine (GO:0044309)                                             |
| extracellular region part (GO:0044421)                                 | focal adhesion (GO:0005925)                                                              | sperm principal piece (GO:0097228)                                    |
| cell-substrate adherens junction (GO:0005924)                          | cell-substrate adherens junction (GO:0005924)                                            | mitotic spindle pole (GO:0097431)                                     |
| macromolecular complex (GO:0032991)                                    | cell-substrate junction (GO:0030055)                                                     | postsynapse (GO:0098794)                                              |
| cell-substrate junction (GO:0030055)                                   | adherens junction (GO:0005912)                                                           | growth cone (GO:0030426)                                              |
| proteasome accessory complex (GO:0022624)                              | anchoring junction (GO:0070161)                                                          | site of polarized growth (GO:0030427)                                 |
| proteasome regulatory particle (GO:0005838)                            | VCP-NSFL1C complex (GO:1990730)                                                          | synapse part (GO:0044456)                                             |
| proteasome core complex (GO:0005839)                                   | mitotic spindle microtubule (GO:1990498)                                                 | ciliary part (GO:0044441)                                             |
| nuclear proteasome complex (GO:0031595)                                | extracellular matrix (GO:0031012)                                                        | neuronal cell body (GO:0043025)                                       |
| cytosol (GO:0005829)                                                   | ribonucleoprotein complex (GO:1990904)                                                   | postsynaptic membrane (GO:0045211)                                    |
| extracellular region (GO:0005576)                                      | intracellular ribonucleoprotein complex (GO:0030529)                                     | dendrite (GO:0030425)                                                 |
| zona pellucida receptor complex (GO:0002199)                           | large ribosomal subunit (GO:0015934)                                                     | dendritic tree (GO:0097447)                                           |
| proteasome regulatory particle, base subcomplex (GO:0008540)           | extracellular region part (GO:0044421)                                                   | cell projection part (GO:0044463)                                     |
| adherens junction (GO:0005912)                                         | extracellular space (GO:0005615)                                                         | plasma membrane bounded cell projection part (GO:0120038)             |
| peptidase complex (GO:1905368)                                         | eukaryotic translation elongation factor 1 complex (GO:0005853)                          | somatodendritic compartment (GO:0036477)                              |
| chaperonin-containing T-complex (GO:0005832)                           | Myb complex (GO:0031523)                                                                 | synapse (GO:0045202)                                                  |
| ribosome (GO:0005840)                                                  | vesicle (GO:0031982)                                                                     | cell body (GO:0044297)                                                |
| anchoring junction (GO:0070161)                                        | extracellular region (GO:0005576)                                                        | cilium (GO:0005929)                                                   |
| intracellular organelle part (GO:0044446)                              | cytosol (GO:0005829)                                                                     | neuron projection (GO:0043005)                                        |
| chaperone complex (GO:0101031)                                         | proteasome core complex, alpha-subunit complex (GO:0019773)                              | plasma membrane bounded cell projection (GO:0120025)                  |
| cytoplasm (GO:0005737)                                                 | type III intermediate filament (GO:0045098)                                              | neuron part (GO:0097458)                                              |
| organelle part (GO:0044422)                                            | macromolecular complex (GO:0032991)                                                      | integral component of plasma membrane (GO:0005887)                    |
| cytoplasmic part (GO:0044444)                                          | endoplasmic reticulum chaperone complex (GO:0034663)                                     | intrinsic component of plasma membrane (GO:0031226)                   |
| protein complex (GO:0043234)                                           | polysome (GO:0005844)                                                                    | cell projection (GO:0042995)                                          |
| cytosolic large ribosomal subunit (GO:0022625)                         | cytoplasmic part (GO:0044444)                                                            | plasma membrane (GO:0005886)                                          |
| ribosomal subunit (GO:0044391)                                         | cell junction (GO:0030054)                                                               |                                                                       |
| proteasome core complex, alpha-subunit complex (GO:0019773)            | intracellular non-membrane-bounded organelle (GO:0043232)                                |                                                                       |
| eukaryotic translation initiation factor 3 complex, eIF3m (GO:0071541) | non-membrane-bounded organelle (GO:0043228)                                              |                                                                       |
| membrane-bounded organelle (GO:0043227)                                | smooth endoplasmic reticulum (GO:0005790)                                                |                                                                       |
| intracellular part (GO:0044424)                                        | glycogen granule (GO:0042587)                                                            |                                                                       |
| cytosolic proteasome complex (GO:0031597)                              | eukaryotic translation initiation factor 3 complex (GO:0005852)                          |                                                                       |
| intracellular (GO:0005622)                                             | tubulin complex (GO:0045298)                                                             |                                                                       |
| organelle (GO:0043226)                                                 | mitochondrial proton-transporting ATP synthase complex, catalytic core F(1) (GO:0000275) |                                                                       |
| intracellular organelle (GO:0043229)                                   | proton-transporting ATP synthase complex, catalytic core F(1) (GO:0045261)               |                                                                       |
| prefoldin complex (GO:0016272)                                         | cytoplasm (GO:0005737)                                                                   |                                                                       |
| eukaryotic translation elongation factor 1 complex (GO:0005853)        | proton-transporting two-sector ATPase complex, catalytic domain (GO:0033178)             |                                                                       |
| nucleocytoplasmic transport complex (GO:0031074)                       | protein complex (GO:0043234)                                                             |                                                                       |

Figure S5
