# Supplementary material for: A novel Microproteomic Approach Using Laser Capture Microdissection to Study Cellular Protrusions
Source: MDPI journal article supplement (doi:10.3390/ijms20051172), 2019-03-07
Supplement: s1 [file s1]

| UNIQUE dCAD PROTRUSION TERMS                                                 | dCAD PROTRUSION IN 2 TERMS                                                             | EXCLUSIVE dCAD PROTRUSION TERMS                                     |
|------------------------------------------------------------------------------|----------------------------------------------------------------------------------------|---------------------------------------------------------------------|
| extracellular exosome (GO:0070062)                                           | myelin sheath (GO:0043209)                                                             | endoplasmic reticulum tubular network membrane (GO:0098826)         |
| extracellular vesicle (GO:1903561)                                           | chaperonin-containing T-complex (GO:0005832)                                           | axon hillock (GO:0043203)                                           |
| extracellular organelle (GO:0043230)                                         | chaperone complex (GO:0101031)                                                         | SCAR complex (GO:0031209)                                           |
| myelin sheath (GO:0043209)                                                   | zona pellucida receptor complex (GO:0002199)                                           | amyloid-beta complex (GO:0106003)                                   |
| vesicle (GO:0031982)                                                         | extracellular exosome (GO:0070062)                                                     | presynaptic active zone membrane (GO:0048787)                       |
| extracellular space (GO:0005615)                                             | extracellular vesicle (GO:1903561)                                                     | zona pellucida receptor complex (GO:0002199)                        |
| extracellular region part (GO:0044421)                                       | extracellular organelle (GO:0043230)                                                   | dense core granule (GO:0031045)                                     |
| extracellular region (GO:0005576)                                            | endoplasmic reticulum chaperone complex (GO:0034663)                                   | integral component of synaptic vesicle membrane (GO:0030285)        |
| focal adhesion (GO:0005925)                                                  | extracellular matrix (GO:0031012)                                                      | blood microparticle (GO:0072562)                                    |
| cell-substrate adherens junction (GO:0005924)                                | extracellular region part (GO:0044421)                                                 | mitochondrial proton-transporting ATP synthase complex (GO:0005753) |
| cell-substrate junction (GO:0030055)                                         | extracellular space (GO:0005615)                                                       | presynaptic membrane (GO:0042734)                                   |
| cytoplasmic part (GO:0044444)                                                | vesicle (GO:0031982)                                                                   | other organism part (GO:0044217)                                    |
| cytoplasm (GO:0005737)                                                       | smooth endoplasmic reticulum (GO:0005790)                                              | other organism cell (GO:0044216)                                    |
| adherens junction (GO:0005912)                                               | proteasome core complex, alpha-subunit complex (GO:0019773)                            | other organism (GO:0044215)                                         |
| anchoring junction (GO:0070161)                                              | extracellular region (GO:0005576)                                                      | proton-transporting ATP synthase complex (GO:0045259)               |
| cytosol (GO:0005829)                                                         | focal adhesion (GO:0005925)                                                            | endoplasmic reticulum tubular network (GO:0071782)                  |
| proton-transporting two-sector ATPase complex (GO:0016469)                   | cell-substrate adherens junction (GO:0005924)                                          | intrinsic component of synaptic vesicle membrane (GO:0098563)       |
| proteasome core complex (GO:0005839)                                         | cell-substrate junction (GO:0030055)                                                   | cell surface furrow (GO:0097610)                                    |
| mitochondrion (GO:0005739)                                                   | proteasome core complex (GO:0005839)                                                   | cleavage furrow (GO:0032154)                                        |
| membrane-bounded organelle (GO:0043227)                                      | presynaptic cytosol (GO:0095523)                                                       | excitatory synapse (GO:0060076)                                     |
| proteasome core complex, alpha-subunit complex (GO:0019773)                  | citrate lyase complex (GO:0009346)                                                     | terminal bouton (GO:0043195)                                        |
| proton-transporting two-sector ATPase complex, catalytic domain (GO:0033178) | extrinsic component of lysosome membrane (GO:0032419)                                  | intercellular bridge (GO:0045171)                                   |
| organelle (GO:0043226)                                                       | adherens junction (GO:0005912)                                                         | axon (GO:0030424)                                                   |
| zona pellucida receptor complex (GO:0002199)                                 | anchoring junction (GO:0070161)                                                        | axon part (GO:0033267)                                              |
| intracellular part (GO:0044424)                                              | mitochondrial nucleoid (GO:0042645)                                                    | stereocilium (GO:0032420)                                           |
| proteasome complex (GO:0005052)                                              | nucleoid (GO:0009295)                                                                  | cell division site part (GO:0032155)                                |
| protein complex (GO:0043234)                                                 | VCP-NSFL1C complex (GO:1990730)                                                        | cell division site (GO:0032153)                                     |
| intracellular (GO:0005622)                                                   | integrin alpha1-beta1 complex (GO:0034665)                                             | mitochondrial nucleoid (GO:0042645)                                 |
| chaperonin-containing T-complex (GO:0005832)                                 | integrin alpha7-beta1 complex (GO:0034677)                                             | nucleoid (GO:0009295)                                               |
| mitochondrial proton-transporting ATP synthase complex (GO:0005753)          | integrin alpha11-beta1 complex (GO:0034681)                                            | SNARE complex (GO:0031201)                                          |
| endopeptidase complex (GO:1905369)                                           | integrin alpha10-beta1 complex (GO:0034680)                                            | filamentous actin (GO:0031941)                                      |
| intracellular organelle part (GO:0044446)                                    | integrin alpha3-beta1 complex (GO:0034667)                                             | proton-transporting two-sector ATPase complex (GO:0016469)          |
| chaperone complex (GO:0101031)                                               | lysosomal matrix (GO:1990836)                                                          | stereocilium bundle (GO:0032421)                                    |
| organelle part (GO:0044422)                                                  | mitotic spindle microtubule (GO:1990498)                                               | endoplasmic reticulum lumen (GO:0005788)                            |
| intracellular organelle (GO:0043229)                                         | sperm mitochondrial sheath (GO:0097226)                                                | lamellipodium (GO:0030027)                                          |
| macromolecular complex (GO:0032991)                                          | RNA nuclear export complex (GO:0042565)                                                | axon terminus (GO:0043679)                                          |
| proton-transporting ATP synthase complex (GO:0045259)                        | NF-kappaB complex (GO:0071159)                                                         | exocytic vesicle (GO:0070382)                                       |
| mitochondrial part (GO:0044429)                                              | mitochondrial ribonuclease P complex (GO:0030678)                                      | cell body (GO:0044297)                                              |
| neuron part (GO:0097458)                                                     | endothelial microparticle (GO:0072563)                                                 | neuron projection terminus (GO:0044306)                             |
| neuron projection (GO:0043005)                                               | tubulin complex (GO:0045298)                                                           | neuron projection (GO:0043005)                                      |
| Arp2/3 protein complex (GO:0005885)                                          | mitochondrial proton-transporting ATP synthase complex, catalytic core F1 (GO:0000275) | mitochondrial matrix (GO:0005759)                                   |
| mitochondrial envelope (GO:0005740)                                          | proton-transporting ATP synthase complex, catalytic core F1 (GO:0045261)               | endoplasmic reticulum (GO:0005783)                                  |
| endoplasmic reticulum chaperone complex (GO:0034663)                         | lysosomal lumen (GO:0043202)                                                           | transport vesicle (GO:0030133)                                      |
| peptidase complex (GO:1905368)                                               | invadopodium (GO:0071437)                                                              | mitochondrial part (GO:0044429)                                     |
| cell (GO:0005623)                                                            | alveolar lamellar body (GO:0097208)                                                    | cell surface (GO:0009986)                                           |
| cell part (GO:0044464)                                                       | pore complex (GO:0046930)                                                              | cell projection part (GO:0044463)                                   |
| organelle membrane (GO:0031090)                                              | mitochondrial matrix (GO:0005759)                                                      | plasma membrane bounded cell projection part (GO:0120038)           |
| mitochondrial inner membrane (GO:0005743)                                    | proteasome complex (GO:0005052)                                                        | endomembrane system (GO:0012505)                                    |
| cell body (GO:0044297)                                                       | endopeptidase complex (GO:1905369)                                                     | neuron part (GO:0097458)                                            |
| mitochondrial protein complex (GO:0098798)                                   | mitochondrial inner membrane (GO:0005743)                                              | somatodendritic compartment (GO:0036477)                            |

Figure S5
