# Supplementary material for: A novel Microproteomic Approach Using Laser Capture Microdissection to Study Cellular Protrusions
Source: MDPI journal article supplement (doi:10.3390/ijms20051172), 2019-03-07
Supplement: s1 [file s1]

F

| UNIQUE GC TERMS                                                 | GC IN 2 TERMS                                               | EXCLUSIVE GC TERMS                                             |
|-----------------------------------------------------------------|-------------------------------------------------------------|----------------------------------------------------------------|
| cytosolic ribosome (GO:0022626)                                 | cytosolic ribosome (GO:0022626)                             | perineuronal net (GO:0072534)                                  |
| myelin sheath (GO:0043209)                                      | chaperonin-containing T-complex (GO:0005832)                | muscle thin filament tropomyosin (GO:0005862)                  |
| extracellular exosome (GO:0070062)                              | chaperone complex (GO:0101031)                              | terminal web (GO:1990357)                                      |
| extracellular vesicle (GO:1903561)                              | zona pellucida receptor complex (GO:0002199)                | microtubule bundle (GO:0097427)                                |
| extracellular organelle (GO:0043230)                            | cytosolic small ribosomal subunit (GO:0022627)              | striated muscle thin filament (GO:0005865)                     |
| cytosolic part (GO:0044445)                                     | cytosolic part (GO:0044445)                                 | BORC complex (GO:0099078)                                      |
| cytosolic small ribosomal subunit (GO:0022627)                  | ribosomal subunit (GO:0044391)                              | axonemal microtubule (GO:0005879)                              |
| ribosomal subunit (GO:0044391)                                  | ribosome (GO:0005840)                                       | phosphopyruvate hydratase complex (GO:0000015)                 |
| ribosome (GO:0005840)                                           | small ribosomal subunit (GO:0015935)                        | myofilament (GO:0036379)                                       |
| cytosolic large ribosomal subunit (GO:0022625)                  | myelin sheath (GO:0043209)                                  | dendritic growth cone (GO:0044294)                             |
| small ribosomal subunit (GO:0015935)                            | cytosolic large ribosomal subunit (GO:0022625)              | axoneme part (GO:0044447)                                      |
| extracellular region part (GO:0005615)                          | extracellular exosome (GO:0070062)                          | outer dynein arm (GO:0036157)                                  |
| chaperonin-containing T-complex (GO:0005832)                    | extracellular vesicle (GO:1903561)                          | HOPS complex (GO:0030897)                                      |
| vesicle (GO:0031982)                                            | extracellular organelle (GO:0043230)                        | AP-3 adaptor complex (GO:0030123)                              |
| extracellular region part (GO:0044421)                          | focal adhesion (GO:0005925)                                 | phagophore assembly site membrane (GO:0034045)                 |
| chaperone complex (GO:0101031)                                  | cell-substrate adherens junction (GO:0005924)               | voltage-gated sodium channel complex (GO:0001518)              |
| focal adhesion (GO:0005925)                                     | cell-substrate junction (GO:0030055)                        | ciliary rootlet (GO:0035253)                                   |
| cell-substrate adherens junction (GO:0005924)                   | ribonucleoprotein complex (GO:1990904)                      | axon initial segment (GO:0043194)                              |
| cell-substrate junction (GO:0030055)                            | intracellular ribonucleoprotein complex (GO:0030529)        | BLOC-1 complex (GO:0031083)                                    |
| ribonucleoprotein complex (GO:1990904)                          | endoplasmic reticulum chaperone complex (GO:0034663)        | node of Ranvier (GO:0033268)                                   |
| intracellular ribonucleoprotein complex (GO:0030529)            | adherens junction (GO:0005912)                              | dendrite terminus (GO:0044292)                                 |
| zona pellucida receptor complex (GO:0002199)                    | anchoring junction (GO:0070161)                             | paranode region of axon (GO:0033270)                           |
| extracellular region (GO:0005576)                               | extracellular matrix (GO:0031012)                           | actin filament (GO:0005884)                                    |
| cytosol (GO:0005829)                                            | extracellular region part (GO:0044421)                      | axonemal dynein complex (GO:0005858)                           |
| adherens junction (GO:0005912)                                  | extracellular space (GO:0005615)                            | BLOC complex (GO:0031082)                                      |
| anchoring junction (GO:0070161)                                 | large ribosomal subunit (GO:0015934)                        | sodium channel complex (GO:0034706)                            |
| proteasome core complex, alpha-subunit complex (GO:0019773)     | vesicle (GO:0031982)                                        | phagophore assembly site (GO:0000407)                          |
| large ribosomal subunit (GO:0015934)                            | extracellular region (GO:0005576)                           | axoneme (GO:0005930)                                           |
| proteasome core complex (GO:0005839)                            | presynaptic cytosol (GO:0099523)                            | ciliary plasm (GO:0097014)                                     |
| extracellular matrix (GO:0031012)                               | citrate lyase complex (GO:0009346)                          | axon part (GO:0033267)                                         |
| macromolecular complex (GO:0032991)                             | inactive sex chromosome (GO:0098577)                        | polymeric cytoskeletal fiber (GO:0099513)                      |
| UBC13-UEV1A complex (GO:0035370)                                | cytosol (GO:0005829)                                        | plasma membrane bounded cell projection cytoplasm (GO:0032838) |
| mitotic spindle microtubule (GO:1990498)                        | type III intermediate filament (GO:0045098)                 | sarcolemma (GO:0042383)                                        |
| methionine adenosyltransferase complex (GO:0048269)             | smooth endoplasmic reticulum (GO:0005790)                   | lytic vacuole (GO:0000323)                                     |
| polysome (GO:0005844)                                           | VCP-NSFL1C complex (GO:1990730)                             | lysosome (GO:0005764)                                          |
| cytoplasmic part (GO:0044444)                                   | lysosomal matrix (GO:1990836)                               | cluster of actin-based cell projections (GO:0098862)           |
| cytoplasm (GO:0005737)                                          | mitotic spindle microtubule (GO:1990498)                    | axon (GO:0030424)                                              |
| eukaryotic translation initiation factor 2 complex (GO:0005850) | NF-kappaB complex (GO:0071159)                              | sarcomere (GO:0030017)                                         |
| endoplasmic reticulum chaperone complex (GO:0034663)            | sperm mitochondrial sheath (GO:0097226)                     | cytoplasmic side of plasma membrane (GO:0009898)               |
| intracellular non-membrane-bounded organelle (GO:0043232)       | RNA nuclear export complex (GO:0042565)                     | growth cone (GO:0030426)                                       |
| non-membrane-bounded organelle (GO:0043228)                     | IRE1-RACK1-PP2A complex (GO:1990630)                        | site of polarized growth (GO:0030427)                          |
| microspike (GO:0044393)                                         | cytoplasmic part (GO:0044444)                               | vacuole (GO:0005773)                                           |
| Schwann cell microvillus (GO:0097454)                           | prefoldin complex (GO:0016272)                              | cytoplasmic side of membrane (GO:0098562)                      |
| Myb complex (GO:0031523)                                        | intracellular non-membrane-bounded organelle (GO:0043232)   | actin-based cell projection (GO:0098858)                       |
| eukaryotic translation elongation factor 1 complex (GO:0005853) | non-membrane-bounded organelle (GO:0043228)                 | supramolecular fiber (GO:0099512)                              |
| nucleocytoplasmic transport complex (GO:0031074)                | macromolecular complex (GO:0032991)                         | supramolecular polymer (GO:0099081)                            |
| intracellular organelle part (GO:0044446)                       | messenger ribonucleoprotein complex (GO:1990124)            | supramolecular complex (GO:0099080)                            |
| organelle part (GO:0044422)                                     | actin filament bundle (GO:0032432)                          | contractile fiber part (GO:0044449)                            |
| organelle (GO:0043226)                                          | proteasome core complex, alpha-subunit complex (GO:0019773) | myofibril (GO:0030016)                                         |
| intracellular part (GO:0044424)                                 | cytoplasm (GO:0005737)                                      | cell projection part (GO:0044463)                              |

Figure S5
