# Supplementary material for: A novel Microproteomic Approach Using Laser Capture Microdissection to Study Cellular Protrusions
Source: MDPI journal article supplement (doi:10.3390/ijms20051172), 2019-03-07
Supplement: s1 [file s1]

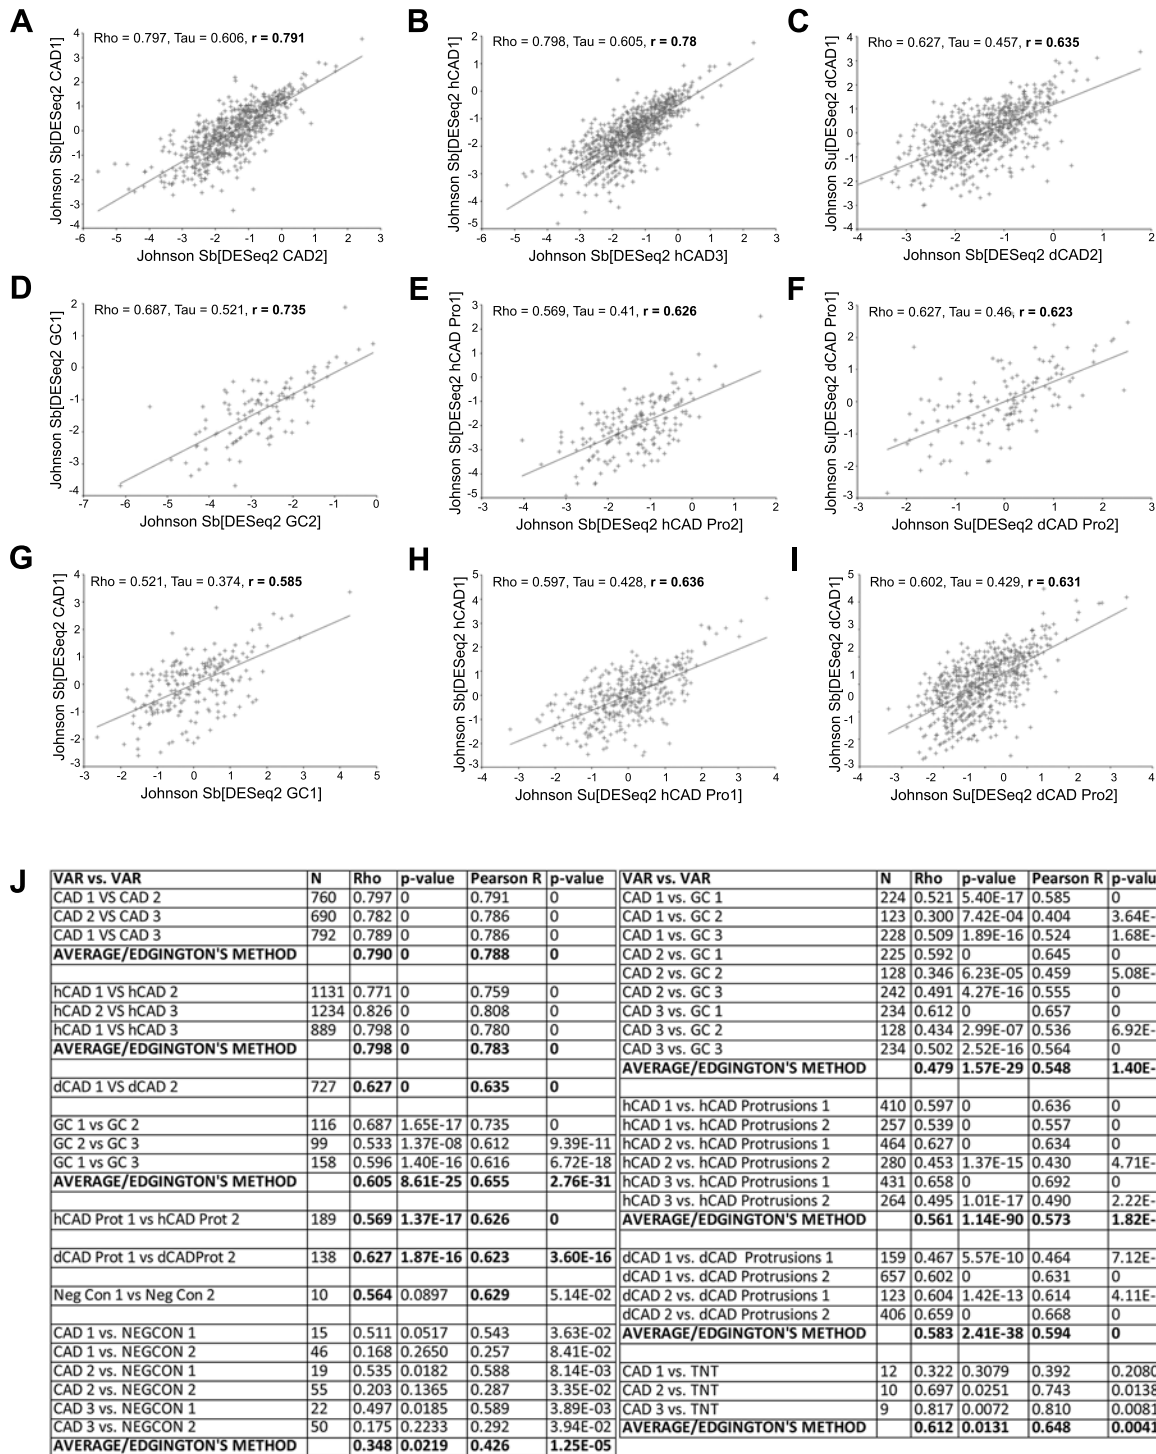

**Figure S2: Pearson Correlations of LCM/MS data.** Normalized data (NSAF/DESeq/Johnson transformation) for each MS sample were determined and graphical representations of Pearson correlation between representative replicate samples are shown for (A) CADs, (B) hCADs, (C) dCADs (D) GCs, (E) hCADs protrusions, (F) dCAD protrusions (G) CADs vs GCs, (H) hCADs vs hCAD protrusions and (I) dCADs vs dCAD protrusions. (J) A summary of all Pearson correlation values is shown. Overall, we obtained strong ( $r > 0.6$ ) and moderately strong correlations ( $0.55 < r < 0.6$ ) with the LCM/MS samples. As expected, weaker correlations were observed with the negative controls when compared to CADs ( $r < 0.43$ ). P-values  $< 0.05$  were considered statistically significant.
