# Supplementary material for: A novel Microproteomic Approach Using Laser Capture Microdissection to Study Cellular Protrusions
Source: MDPI journal article supplement (doi:10.3390/ijms20051172), 2019-03-07
Supplement: s1 [file s1]

C

| GC: TOTAL UNIQUE PROTEINS (444) |         |           |          |           |         |          | GC: "in 2" (193) |          |          | GC: Exclusive (39) |
|---------------------------------|---------|-----------|----------|-----------|---------|----------|------------------|----------|----------|--------------------|
| 4930519F16RIK                   | CS      | GPI       | MAP1LC3B | PSMA3     | RPS17   | TUBA1C   | ACLY             | HSPA5    | RPL4     | ACTA1              |
| A0A097PUD0                      | CTNNA1  | GSTP1     | MARCKSL1 | PSMA5     | RPS18   | TUBB3    | ACTB             | HSPA8    | RPL6     | ARF40S             |
| A0A097PUG4                      | D1PAS1  | H2AFV     | MAT2A    | PSMA6     | RPS19   | TUBB4A   | ACTG1            | HSPA9    | RPL7A    | ATAT1              |
| ACAT1                           | DAP     | H2AFX     | MAT2B    | PSMA7     | RPS2    | TUBB4B   | ACTN1            | HSPD1    | RPL9     | B7U9H2             |
| ACLY                            | DAPK1   | HARS      | MBP      | PSMB1     | RPS20   | TUBB5    | AKR1B1           | HSPF1    | RPLP0    | BLVRB              |
| ACOT7                           | DDOST   | HBB-B1    | MCM3     | PSMB3     | RPS21   | TXN      | ALB              | HYOU1    | RPLP1    | BPIFC              |
| ACTA1                           | DDX21   | HDAC7     | MDH1     | PSMB6     | RPS23   | UBA1     | ALDOA            | IL1RAPL1 | RPLP2    | CCDC93             |
| ACTBL2                          | DDX39B  | HGH1      | MDH2     | PSMB7     | RPS24   | UBA52    | ANXA2            | ILF2     | RPS10    | COBL               |
| ACTB                            | DDX3X   | HINT1     | METTL3   | PSMD12    | RPS25   | UBE2J1   | APRT             | JUP      | RPS12    | COL6A1             |
| ACTG1                           | DDX5    | HIST1H1A  | MIF      | PSMD4     | RPS26   | UBE2N    | ARHGDIA          | KIF20B   | RPS14    | D1PAS1             |
| ACTN1                           | DHFR    | HIST1H1C  | MROH6    | PSME3     | RPS28   | UBE2V1   | ASL              | KPNA2    | RPS15A   | DAP                |
| AKR1B1                          | DIP2C   | HIST1H1D  | MYBBP1A  | PSPH      | RPS29   | UCHL1    | ASNA1            | KPNB1    | RPS18    | DAPK1              |
| ALB                             | DNAH5   | HIST1H1E  | MYG1     | PTBP1     | RPS3    | ULK2     | ASNS             | LDHA     | RPS19    | DIP2C              |
| ALDOA                           | DPYSL3  | HIST1H2AB | MYH9     | PTMA      | RPS3A   | UQCRC1   | ATP5A1           | LGALS1   | RPS2     | DNAH5              |
| ANXA2                           | DSG1B   | HIST1H2BH | MYL12A   | PTPRZ1    | RPS4X   | UQCRCF51 | ATP5B            | LRRRC47  | RPS24    | DSG1B              |
| APRT                            | DSP     | HIST1H2BM | MYL12B   | Q80Y73    | RPS5    | USP5     | BPIFC            | MDH1     | RPS25    | ENO3               |
| ARF1                            | DSTN    | HIST1H3A  | MYL6     | DSCAML1   | RPS7    | UTP14B   | CACYBP           | MDH2     | RPS26    | FAM234A            |
| ARF40S                          | EEF1A1  | HIST1H3B  | NAA25    | RAB11B    | RPS8    | VAT1     | CCT2             | MROH6    | RPS28    | FBXO44             |
| ARG1                            | EEF1B   | HIST1H4A  | NACA     | RAB1A     | RPS9    | VCP      | CCT3             | MYL12A   | RPS3     | GM10334            |
| ARHGDIA                         | EEF1D   | HIST2H2AC | NAP1L1   | RAB18     | RPSA    | VCPIP1   | CCT4             | NACA     | RPS3A    | GM13125            |
| ARL3                            | EEF1G   | HIST2H2BB | NCAM1    | RAB2A     | RWDD4   | VDAC1    | CCT5             | NAP1L1   | RPS4X    | GM19638            |
| ARPC4                           | EEF2    | HIST3H2BB | NCL      | RAB39A    | S100A14 | VDAC3    | CCT6A            | NCL      | RPS5     | GNA12              |
| ASL                             | EIF2A   | HMGNI     | NME1     | RAB7A     | S100A6  | VIM      | CCT7             | NPM1     | RPS7     | HDAC7              |
| ASNA1                           | EIF2S1  | HMGNI     | NMT1     | RACK1     | SARNP   | VPS13B   | CCT8             | NUDC     | RPS8     | KRT90              |
| ASNS                            | EIF2S3X | HNRNPA0   | NPM1     | RALGAPA2  | SARS    | VPS39    | CFL1             | P4HB     | RPS9     | KXD1               |
| ASS1                            | EIF3F   | HNRNPA1   | NSUN2    | RAN       | SCN2A   | XPNPPEP1 | CLDN3            | PA2G4    | RPSA     | LF1                |
| ATAT1                           | EIF3G   | HNRNPA2B1 | NUDC     | RAP1A     | SDHA    | YBX1     | DDX39B           | PABPC1   | SARNP    | LOXHD1             |
| ATP5A1                          | EIF3L   | HNRNPAB   | OLA1     | RARS      | SEPT2   | YBX3     | DDX5             | PCBP1    | SFN      | PPL                |
| ATP5B                           | EIF4A1  | HNRNPD    | P4HB     | RBM3      | SERBP1  | YWHAB    | DPYSL3           | PCBP2    | SLC25A4  | PTPRZ1             |
| ATP5F1                          | EIF4B   | HNRNPF    | PA2G4    | RBMX      | SERPIN1 | YWHAE    | DSP              | PDCD5    | SLC25A5  | RAB39A             |
| ATP5O                           | EIF4H   | HNRNPH1   | PABPC1   | RNF181    | SFN     | YWHAG    | EEF1A1           | PDE4D    | SLC3A2   | RPGRIIP1L          |
| ATP6V1B2                        | EIF5A   | HNRNPH3   | PAFAH1B3 | RPA3      | SLC25A3 | YWHAQ    | EEF1D            | PDIA3    | SRSF3    | SCN2A              |
| B7U9H2                          | ELAVL1  | HNRNPK    | PCBP1    | RPAP1     | SLC25A4 | YWHAZ    | EEF1G            | PDIA6    | STMN1    | TPM2               |
| BASP1                           | ELAVL4  | HNRNPM    | PCBP2    | RPGRIIP1L | SLC25A5 | ZBED4    | EEF2             | PEBP1    | SYNCRIP  | UBE2J1             |
| BC094435                        | ENO1    | HNRNPU    | PCBP3    | RPL10A    | SLC3A2  | ZFP65    | EIF4A1           | PFDN2    | SYTL4    | ULK2               |
| BLVRB                           | ENO3    | HSP90AA1  | PDAP1    | RPL10L    | SNCG    | ZSCAN20  | EIF5A            | PFDN4    | TAGLN2   | VPS13B             |
| BPIFC                           | EPRS    | HSP90AB1  | PDCD5    | RPL11     | SND1    |          | ELAVL1           | PFN1     | TARDBP   | VPS39              |
| BTF3                            | ETF1    | HSP90B1   | PDE4D    | RPL12     | SNRPA   |          | ENO1             | PGK1     | TARS     | ZBED4              |
| BZW2                            | EZR     | HSPA4     | PDHB     | RPL13     | SNRPD3  |          | ETF1             | PHB      | TCP1     | ZSCAN20            |
| CACYBP                          | FABP5   | HSPA5     | PDIA3    | RPL14     | SRM     |          | FAU              | PHGDH    | TPI1     |                    |
| CAD                             | FAM234A | HSPA8     | PDIA6    | RPL17     | SRSF3   |          | FDPS             | PKM      | TPM3     |                    |
| CALM1                           | FASN    | HSPA9     | PEBP1    | RPL18     | ST13    |          | FH               | PPIA     | TRAP1    |                    |
| CALU                            | FAU     | HSPD1     | PFDN2    | RPL22     | STIP1   |          | FLNA             | PRDX1    | TUBA1A   |                    |
| CAND1                           | FBXO44  | HSPF1     | PFDN4    | RPL23     | STMN1   |          | FLNB             | PRDX2    | TUBA1C   |                    |
| CAPRIN1                         | FDP5    | HSPH1     | PKFL     | RPL23A    | STOML2  |          | FN1              | PRDX4    | TUBB3    |                    |
| CAPZA2                          | FGF22   | HYOU1     | PFN1     | RPL24     | SYN2    |          | FSCN1            | PRPH     | TUBB5    |                    |
| CCDC124                         | FH      | IL1RAPL1  | PGAM1    | RPL26     | SYNCRIP |          | G3BP1            | PSMA5    | UBA1     |                    |
| CCDC93                          | FIS1    | ILF2      | PGD      | RPL27     | SYTL4   |          | GAPDH            | PSMA7    | UBA52    |                    |
| CCT2                            | FLNA    | ITGB1     | PGK1     | RPL31     | TAGLN2  |          | GARS             | PSMB6    | VAT1     |                    |
| CCT3                            | FLNB    | ITIH2     | PGLS     | RPL34     | TARDBP  |          | GD12             | PTBP1    | VCP      |                    |
| CCT4                            | FN1     | JUP       | PHB      | RPL35     | TARS    |          | GLRX3            | RAB1A    | VCPIP1   |                    |
| CCT5                            | FN1     | KARS      | PHB2     | RPL38     | TBCA    |          | GSTP1            | RACK1    | VDAC1    |                    |
| CCT6A                           | FUBP1   | KCNAB2    | PHGDH    | RPL4      | TCP1    |          | HINT1            | RALGAPA2 | VIM      |                    |
| CCT7                            | FXR1    | KRT90     | PKM      | RPL5      | TF      |          | HIST1H2AB        | RAN      | XPNPPEP1 |                    |
| CCT8                            | G3BP1   | KIF20B    | PLEC     | RPL6      | TFRC    |          | HIST1H3A         | RAP1A    | YBX1     |                    |
| CDC42                           | GANAB   | KIF4      | POU2F1   | RPL7      | TIAL1   |          | HIST1H4A         | RBM3     | YWHAE    |                    |
| CDV3                            | GAPDH   | KPNA2     | PPIA     | RPL7A     | TKT     |          | HIST2H2AC        | RBMX     | YWHAZ    |                    |
| CFL1                            | GARS    | KPNB1     | PPL      | RPL9      | TMPO    |          | HNRNPA1          | RPAP1    |          |                    |
| CHCHD2                          | GCLM    | KXD1      | PRDM16   | RPLP0     | TPI1    |          | HNRNPA2B1        | RPL10A   |          |                    |
| CHMP4B                          | GDI2    | LDHA      | PRDX1    | RPLP1     | TPM2    |          | HNRNPAB          | RPL11    |          |                    |
| CLCF1                           | GLRX3   | LF1       | PRDX2    | RPLP2     | TPM3    |          | HNRNPD           | RPL12    |          |                    |
| CLDN3                           | GM10334 | LGALS1    | PRDX4    | RPS10     | TPPP3   |          | HNRNPF           | RPL14    |          |                    |
| CLIC1                           | GM13125 | LOXHD1    | PREP     | RPS11     | TPT1    |          | HNRNPK           | RPL18    |          |                    |
| CLTC                            | GM19638 | LRMP      | PRKACA   | RPS12     | TRAJ3   |          | HNRNPU           | RPL22    |          |                    |
| COBL                            | GM5409  | LRRRC47   | PRKACB   | RPS13     | TRAP1   |          | HSP90AA1         | RPL23A   |          |                    |
| COL6A1                          | GM5414  | LRRCS9    | PRPH     | RPS14     | TRY10   |          | HSP90AB1         | RPL24    |          |                    |
| CORO1C                          | GNA12   | LYZ1      | PSAT1    | RPS15A    | TUBA1A  |          | HSP90B1          | RPL31    |          |                    |
| CRMP1                           | GNAS    | MAP1B     | PSMA2    | RPS16     | TUBA1B  |          | HSPA4            | RPL35    |          |                    |

Figure S4: Comparison of protein lists obtained by LCM/MS, identified with different analysis approaches. Comparison of the “Total unique protein” lists vs protein lists obtained from proteins “in at least 2 samples” (additive approach) or “exclusive” protein lists (subtractive approach) obtained from LCM/MS of (A) hCAD protrusions; (B) dCAD protrusions; or (C) GCs
