# Supplementary material for: A novel Microproteomic Approach Using Laser Capture Microdissection to Study Cellular Protrusions
Source: MDPI journal article supplement (doi:10.3390/ijms20051172), 2019-03-07
Supplement: s1 [file s1]

G

| UNIQUE TNT TERMS                                                                      | EXCLUSIVE TNT TERMS                                                                   |
|---------------------------------------------------------------------------------------|---------------------------------------------------------------------------------------|
| RNA N6-methyladenosine methyltransferase complex (GO:0036396)                         | sublamina densa (GO:0061618)                                                          |
| sublamina densa (GO:0061618)                                                          | dendritic branch (GO:0044307)                                                         |
| SMN-Gemin2 complex (GO:0034718)                                                       | PAN complex (GO:0031251)                                                              |
| mRNA editing complex (GO:0045293)                                                     | interphotoreceptor matrix (GO:0033165)                                                |
| dendritic branch (GO:0044307)                                                         | activin receptor complex (GO:0048179)                                                 |
| PAN complex (GO:0031251)                                                              | postsynaptic recycling endosome (GO:0098837)                                          |
| interphotoreceptor matrix (GO:0033165)                                                | axonal spine (GO:0044308)                                                             |
| activin receptor complex (GO:0048179)                                                 | stereocilia ankle link complex (GO:0002142)                                           |
| delta DNA polymerase complex (GO:0043625)                                             | MutLalpha complex (GO:0032389)                                                        |
| postsynaptic recycling endosome (GO:0098837)                                          | USH2 complex (GO:1990696)                                                             |
| axonal spine (GO:0044308)                                                             | intrinsic component of postsynaptic density membrane (GO:0099146)                     |
| stereocilia ankle link complex (GO:0002142)                                           | integral component of postsynaptic density membrane (GO:0099061)                      |
| MutLalpha complex (GO:0032389)                                                        | stereocilia ankle link (GO:0002141)                                                   |
| USH2 complex (GO:1990696)                                                             | dense body (GO:0097433)                                                               |
| intrinsic component of postsynaptic density membrane (GO:0099146)                     | periciliary membrane compartment (GO:1990075)                                         |
| integral component of postsynaptic density membrane (GO:0099061)                      | intrinsic component of postsynaptic specialization membrane (GO:0098948)              |
| stereocilia ankle link (GO:0002141)                                                   | integral component of postsynaptic specialization membrane (GO:0099060)               |
| dense body (GO:0097433)                                                               | stereocilia coupling link (GO:0002139)                                                |
| periciliary membrane compartment (GO:1990075)                                         | integral component of luminal side of endoplasmic reticulum membrane (GO:0071556)     |
| intrinsic component of postsynaptic specialization membrane (GO:0098948)              | integral component of cytoplasmic side of endoplasmic reticulum membrane (GO:0071458) |
| integral component of postsynaptic specialization membrane (GO:0099060)               | luminal side of endoplasmic reticulum membrane (GO:0098553)                           |
| stereocilia coupling link (GO:0002139)                                                | pericentriolar material (GO:0000242)                                                  |
| integral component of luminal side of endoplasmic reticulum membrane (GO:0071556)     | pi-body (GO:0071546)                                                                  |
| integral component of cytoplasmic side of endoplasmic reticulum membrane (GO:0071458) | postsynaptic endosome (GO:0098845)                                                    |
| luminal side of endoplasmic reticulum membrane (GO:0098553)                           | dendritic spine membrane (GO:0032591)                                                 |
| pericentriolar material (GO:0000242)                                                  | endoplasmic reticulum-Golgi intermediate compartment membrane (GO:0033116)            |
| phagocytic vesicle membrane (GO:0030670)                                              | mismatch repair complex (GO:0032300)                                                  |
| pi-body (GO:0071546)                                                                  | neurofilament (GO:0005883)                                                            |
| postsynaptic endosome (GO:0098845)                                                    | inner dynein arm (GO:0036156)                                                         |
| dendritic spine membrane (GO:0032591)                                                 | cytoplasmic side of endoplasmic reticulum membrane (GO:0098554)                       |
| endoplasmic reticulum-Golgi intermediate compartment membrane (GO:0033116)            | ciliary membrane (GO:0060170)                                                         |
| mismatch repair complex (GO:0032300)                                                  | recycling endosome (GO:0055037)                                                       |
| DNA repair complex (GO:1990391)                                                       | condensed chromosome, centromeric region (GO:0000779)                                 |
| cis-Golgi network (GO:0005801)                                                        | receptor complex (GO:0043235)                                                         |
| ciliary membrane (GO:0060170)                                                         | endoplasmic reticulum-Golgi intermediate compartment (GO:0005793)                     |
| condensed chromosome, centromeric region (GO:0000779)                                 | ciliary transition zone (GO:0035869)                                                  |
| recycling endosome (GO:0055037)                                                       | neuromuscular junction (GO:0031594)                                                   |
| receptor complex (GO:0043235)                                                         | integral component of endoplasmic reticulum membrane (GO:0030176)                     |
| neuron projection membrane (GO:0032589)                                               | intrinsic component of endoplasmic reticulum membrane (GO:0031227)                    |
| photoreceptor cell cilium (GO:0097733)                                                | ciliary part (GO:0044441)                                                             |
| ciliary part (GO:0044441)                                                             | plasma membrane bounded cell projection cytoplasm (GO:0032838)                        |
| 9+0 non-motile cilium (GO:0097731)                                                    | endoplasmic reticulum part (GO:0044432)                                               |
| plasma membrane bounded cell projection cytoplasm (GO:0032838)                        | cell projection membrane (GO:0031253)                                                 |
| axoneme (GO:0005930)                                                                  | endoplasmic reticulum membrane (GO:0005789)                                           |
| ciliary plasm (GO:0097014)                                                            | cilium (GO:0005929)                                                                   |
| integral component of endoplasmic reticulum membrane (GO:0030176)                     | nuclear outer membrane-endoplasmic reticulum membrane network (GO:0042175)            |
| non-motile cilium (GO:0097730)                                                        | endoplasmic reticulum subcompartment (GO:0098827)                                     |
| intrinsic component of endoplasmic reticulum membrane (GO:0031227)                    | endoplasmic reticulum (GO:0005783)                                                    |
| Golgi membrane (GO:0000139)                                                           | plasma membrane (GO:0005886)                                                          |
| endoplasmic reticulum-Golgi intermediate compartment (GO:0005793)                     | cell periphery (GO:0071944)                                                           |

Figure S5
