# Supplementary material for: A novel Microproteomic Approach Using Laser Capture Microdissection to Study Cellular Protrusions
Source: MDPI journal article supplement (doi:10.3390/ijms20051172), 2019-03-07
Supplement: s1 [file s1]

C

| UNIQUE dCAD TERMS                                         | dCAD IN 2 TERMS                                                        | EXCLUSIVE dCAD TERMS                                                   |
|-----------------------------------------------------------|------------------------------------------------------------------------|------------------------------------------------------------------------|
| intracellular organelle part (GO:0044446)                 | extracellular exosome (GO:0070062)                                     | organellar large ribosomal subunit (GO:0000315)                        |
| organelle part (GO:0044422)                               | extracellular vesicle (GO:1903561)                                     | mitochondrial large ribosomal subunit (GO:0005762)                     |
| cytoplasm (GO:0005737)                                    | extracellular organelle (GO:0043230)                                   | mitochondrion (GO:0005739)                                             |
| organelle (GO:0043226)                                    | ribonucleoprotein complex (GO:1990904)                                 | cytoplasm (GO:0005737)                                                 |
| intracellular part (GO:0044424)                           | intracellular ribonucleoprotein complex (GO:0030529)                   | organellar ribosome (GO:0000313)                                       |
| intracellular (GO:0005622)                                | myelin sheath (GO:0043209)                                             | mitochondrial ribosome (GO:0005761)                                    |
| cytoplasmic part (GO:0044444)                             | macromolecular complex (GO:0032991)                                    | intracellular part (GO:0044424)                                        |
| intracellular membrane-bounded organelle (GO:0043231)     | proteasome regulatory particle (GO:0005838)                            | cytoplasmic part (GO:0044444)                                          |
| macromolecular complex (GO:0032991)                       | proteasome complex (GO:0000502)                                        | intracellular (GO:0005622)                                             |
| cell part (GO:0044464)                                    | endopeptidase complex (GO:1905369)                                     | organelle (GO:0043226)                                                 |
| cell (GO:0005623)                                         | eukaryotic translation initiation factor 3 complex (GO:0005852)        | intracellular organelle (GO:0043229)                                   |
| ribonucleoprotein complex (GO:1990904)                    | cytosolic large ribosomal subunit (GO:0022625)                         | membrane-bounded organelle (GO:0043227)                                |
| intracellular ribonucleoprotein complex (GO:0030529)      | cytosol (GO:0005829)                                                   | mitochondrial part (GO:0044429)                                        |
| intracellular organelle lumen (GO:0070013)                | proteasome accessory complex (GO:0022624)                              | intracellular membrane-bounded organelle (GO:0043231)                  |
| membrane-enclosed lumen (GO:0031974)                      | cytosolic ribosome (GO:0022626)                                        | uniplex complex (GO:1990246)                                           |
| organelle lumen (GO:0043233)                              | extracellular region part (GO:0044421)                                 | mitochondrial inner membrane protein insertion complex (GO:0042721)    |
| cytosol (GO:0005829)                                      | extracellular space (GO:0005615)                                       | mitochondrial matrix (GO:0005759)                                      |
| protein complex (GO:0043234)                              | vesicle (GO:0031982)                                                   | cell part (GO:0044464)                                                 |
| extracellular exosome (GO:0070062)                        | cytosolic part (GO:0044445)                                            | cell (GO:0005623)                                                      |
| extracellular vesicle (GO:1903561)                        | aminoacyl-tRNA synthetase multienzyme complex (GO:0017101)             | Hrd1p ubiquitin ligase ERAD-L complex (GO:0000839)                     |
| extracellular organelle (GO:0043230)                      | intracellular organelle part (GO:0044446)                              | ciliary pocket membrane (GO:0020018)                                   |
| nuclear part (GO:0044428)                                 | organelle part (GO:0044422)                                            | ciliary pocket (GO:0020016)                                            |
| mitochondrion (GO:0005739)                                | cytoplasmic part (GO:0044444)                                          | m-AAA complex (GO:0005745)                                             |
| nucleus (GO:0005634)                                      | proteasome regulatory particle, base subcomplex (GO:0008540)           | intracellular organelle part (GO:0044446)                              |
| intracellular non-membrane-bounded organelle (GO:0043232) | protein complex (GO:0043234)                                           | organelle part (GO:0044422)                                            |
| non-membrane-bounded organelle (GO:0043228)               | intracellular part (GO:0044424)                                        | mitochondrial inner membrane (GO:0005743)                              |
| nuclear lumen (GO:0031981)                                | intracellular (GO:0005622)                                             | mitochondrial membrane (GO:0031966)                                    |
| vesicle (GO:0031982)                                      | peptidase complex (GO:1905368)                                         | phosphatidylinositol 3-kinase complex, class III, type II (GO:0034272) |
| mitochondrial part (GO:0044429)                           | cytoplasm (GO:0005737)                                                 | phosphatidylinositol 3-kinase complex, class III, type I (GO:0034271)  |
| organelle envelope (GO:0031967)                           | ribosome (GO:0005840)                                                  | calcineurin complex (GO:0005955)                                       |
| envelope (GO:0031975)                                     | extracellular region (GO:0005576)                                      | organelle membrane (GO:0031090)                                        |
| nucleoplasm (GO:0005654)                                  | membrane-bounded organelle (GO:0043227)                                | mitochondrial envelope (GO:0005740)                                    |
| catalytic complex (GO:1902494)                            | focal adhesion (GO:0005925)                                            | organelle inner membrane (GO:0019866)                                  |
| organelle membrane (GO:0031090)                           | organelle (GO:0043226)                                                 | clathrin complex (GO:0071439)                                          |
| nucleolus (GO:0005730)                                    | cell-substrate adherens junction (GO:0005924)                          | sorting endosome (GO:0097443)                                          |
| spliceosomal complex (GO:0005681)                         | cell-substrate junction (GO:0030055)                                   | GPI-anchor transamidase complex (GO:0042765)                           |
| mitochondrial membrane (GO:0031966)                       | nuclear proteasome complex (GO:0031595)                                | Hrd1p ubiquitin ligase complex (GO:0000836)                            |
| mitochondrial envelope (GO:0005740)                       | eukaryotic translation initiation factor 3 complex, eIF3m (GO:0071541) | ER ubiquitin ligase complex (GO:0000835)                               |
| mitochondrial inner membrane (GO:0005743)                 | intracellular organelle (GO:0043229)                                   | protein phosphatase 4 complex (GO:0030289)                             |
| organelle inner membrane (GO:0019866)                     | chaperonin-containing T-complex (GO:0005832)                           | organelle envelope (GO:0031967)                                        |
| membrane protein complex (GO:0098796)                     | cytosolic proteasome complex (GO:0031597)                              | envelope (GO:0031975)                                                  |
| catalytic step 2 spliceosome (GO:0071013)                 | intracellular membrane-bounded organelle (GO:0043231)                  | ESCRT complex (GO:0036452)                                             |
| mitochondrial matrix (GO:0005759)                         | chaperone complex (GO:0101031)                                         | meiotic spindle (GO:0072687)                                           |
| endopeptidase complex (GO:1905369)                        | adherens junction (GO:0005912)                                         | astral microtubule (GO:0000235)                                        |
| proteasome complex (GO:0000502)                           | intracellular organelle lumen (GO:0070013)                             | signal peptidase complex (GO:0005787)                                  |
| mitochondrial protein complex (GO:0098798)                | membrane-enclosed lumen (GO:0031974)                                   | Bcl-2 family protein complex (GO:0097136)                              |
| extracellular space (GO:0005615)                          | organelle lumen (GO:0043233)                                           | Mre11 complex (GO:0030870)                                             |
| peptidase complex (GO:1905368)                            | anchoring junction (GO:0070161)                                        | mitochondrial membrane part (GO:0044455)                               |
| extracellular region part (GO:0044421)                    | ribosomal subunit (GO:0044391)                                         | integral component of mitochondrial membrane (GO:0032592)              |
| endomembrane system (GO:0012505)                          | zona pellucida receptor complex (GO:0002199)                           | membrane-enclosed lumen (GO:0031974)                                   |

Figure S5
