# Supplementary material for: A novel Microproteomic Approach Using Laser Capture Microdissection to Study Cellular Protrusions
Source: MDPI journal article supplement (doi:10.3390/ijms20051172), 2019-03-07
Supplement: s1 [file s1]

A

| UNIQUE CAD TERMS                                                | CAD IN 2 TERMS                                                         | EXCLUSIVE CAD TERMS                                                                       |
|-----------------------------------------------------------------|------------------------------------------------------------------------|-------------------------------------------------------------------------------------------|
| ribonucleoprotein complex (GO:1990904)                          | ribonucleoprotein complex (GO:1990904)                                 | actomyosin contractile ring (GO:0005826)                                                  |
| intracellular ribonucleoprotein complex (GO:0030529)            | intracellular ribonucleoprotein complex (GO:0030529)                   | chromatin silencing complex (GO:0005677)                                                  |
| macromolecular complex (GO:0032991)                             | myelin sheath (GO:0043209)                                             | bleb (GO:0032059)                                                                         |
| intracellular organelle part (GO:0044446)                       | extracellular exosome (GO:0070062)                                     | MCM8-MCM9 complex (GO:0097362)                                                            |
| extracellular exosome (GO:0070062)                              | extracellular vesicle (GO:1903561)                                     | apoptosome (GO:0043293)                                                                   |
| extracellular vesicle (GO:1903561)                              | extracellular organelle (GO:0043230)                                   | haptoglobin-hemoglobin complex (GO:0031838)                                               |
| extracellular organelle (GO:0043230)                            | macromolecular complex (GO:0032991)                                    | myosin II complex (GO:0016460)                                                            |
| organelle part (GO:0044422)                                     | intracellular organelle part (GO:0044446)                              | translocon complex (GO:0071256)                                                           |
| intracellular part (GO:0044424)                                 | organelle part (GO:0044422)                                            | Sec61 translocon complex (GO:0005784)                                                     |
| intracellular (GO:0005622)                                      | proteasome complex (GO:0000502)                                        | contractile ring (GO:0070938)                                                             |
| organelle (GO:0043226)                                          | endopeptidase complex (GO:1905369)                                     | muscle myosin complex (GO:0005859)                                                        |
| intracellular organelle (GO:0043229)                            | vesicle (GO:0031982)                                                   | smooth muscle contractile fiber (GO:0030485)                                              |
| membrane-bounded organelle (GO:0043227)                         | cytosol (GO:0005829)                                                   | myosin filament (GO:0032982)                                                              |
| cytoplasm (GO:0005737)                                          | intracellular part (GO:0044424)                                        | kinesin complex (GO:0005871)                                                              |
| intracellular membrane-bounded organelle (GO:0043231)           | intracellular (GO:0005622)                                             | neuronal ribonucleoprotein granule (GO:0071598)                                           |
| cytoplasmic part (GO:0044444)                                   | cytosolic part (GO:0044445)                                            | CCR4-NOT core complex (GO:0030015)                                                        |
| cytosol (GO:0005829)                                            | cytoplasm (GO:0005737)                                                 | kinetochore microtubule (GO:0005828)                                                      |
| protein complex (GO:0043234)                                    | extracellular space (GO:0005615)                                       | myosin complex (GO:0016459)                                                               |
| intracellular organelle lumen (GO:0070013)                      | extracellular region part (GO:0044421)                                 | rough endoplasmic reticulum membrane (GO:0030867)                                         |
| membrane-enclosed lumen (GO:0031974)                            | cytosolic large ribosomal subunit (GO:0022625)                         | microtubule associated complex (GO:0005875)                                               |
| organelle lumen (GO:0043233)                                    | protein complex (GO:0043234)                                           | signal recognition particle receptor complex (GO:0005785)                                 |
| nuclear part (GO:0044428)                                       | membrane-bounded organelle (GO:0043227)                                | HAUS complex (GO:0070652)                                                                 |
| intracellular non-membrane-bounded organelle (GO:0043232)       | cytosolic ribosome (GO:0022626)                                        | nuclear transcriptional repressor complex (GO:0090568)                                    |
| non-membrane-bounded organelle (GO:0043228)                     | spliceosomal complex (GO:0005681)                                      | outer dynein arm (GO:0036157)                                                             |
| vesicle (GO:0031982)                                            | cytoplasmic part (GO:0044444)                                          | mitochondrial proton-transporting ATP synthase complex, coupling factor F(o) (GO:0000276) |
| nucleus (GO:0005634)                                            | intracellular organelle (GO:0043229)                                   | MCM complex (GO:0042555)                                                                  |
| cell part (GO:0044464)                                          | proteasome accessory complex (GO:0022624)                              | nuclear exosome (RNase complex) (GO:0000176)                                              |
| cell (GO:0005623)                                               | organelle (GO:0043226)                                                 | condensed nuclear chromosome kinetochore (GO:0000778)                                     |
| myelin sheath (GO:0043209)                                      | proteasome regulatory particle (GO:0005838)                            | cortical actin cytoskeleton (GO:0030864)                                                  |
| nuclear lumen (GO:0031981)                                      | eukaryotic translation initiation factor 3 complex (GO:0005852)        | cell division site part (GO:0032155)                                                      |
| spliceosomal complex (GO:0005681)                               | intracellular membrane-bounded organelle (GO:0043231)                  | cell division site (GO:0032153)                                                           |
| extracellular space (GO:0005615)                                | peptidase complex (GO:1905368)                                         | contractile actin filament bundle (GO:0097517)                                            |
| extracellular region part (GO:0044421)                          | extracellular region (GO:0005576)                                      | stress fiber (GO:0001725)                                                                 |
| proteasome complex (GO:0000502)                                 | aminoacyl-tRNA synthetase multienzyme complex (GO:0017101)             | actomyosin (GO:0042641)                                                                   |
| endopeptidase complex (GO:1905369)                              | nucleus (GO:0005634)                                                   | cornified envelope (GO:0001533)                                                           |
| catalytic step 2 spliceosome (GO:0071013)                       | intracellular organelle lumen (GO:0070013)                             | rough endoplasmic reticulum (GO:0005791)                                                  |
| extracellular region (GO:0005576)                               | membrane-enclosed lumen (GO:0031974)                                   | contractile fiber (GO:0043292)                                                            |
| nucleolus (GO:0005730)                                          | organelle lumen (GO:0043233)                                           | cytoplasmic side of plasma membrane (GO:0009898)                                          |
| peptidase complex (GO:1905368)                                  | nuclear part (GO:0044428)                                              | cytoplasmic side of membrane (GO:0098562)                                                 |
| mitochondrion (GO:0005739)                                      | catalytic step 2 spliceosome (GO:0071013)                              | supramolecular fiber (GO:0099512)                                                         |
| proteasome accessory complex (GO:0022624)                       | cell part (GO:0044464)                                                 | supramolecular polymer (GO:0099081)                                                       |
| proteasome regulatory particle (GO:0005838)                     | cell (GO:0005623)                                                      | supramolecular complex (GO:0099080)                                                       |
| eukaryotic translation initiation factor 3 complex (GO:0005852) | eukaryotic translation initiation factor 3 complex, eIF3m (GO:0071541) | actin filament bundle (GO:0032432)                                                        |
| spliceosomal snRNP complex (GO:0097525)                         | focal adhesion (GO:0005925)                                            | transcriptional repressor complex (GO:0017053)                                            |
| focal adhesion (GO:0005925)                                     | ribosome (GO:0005840)                                                  | myofibril (GO:0030016)                                                                    |
| nucleoplasm (GO:0005654)                                        | cell-substrate adherens junction (GO:0005924)                          | cortical cytoskeleton (GO:0030863)                                                        |
| aminoacyl-tRNA synthetase multienzyme complex (GO:0017101)      | cell-substrate junction (GO:0030055)                                   | lateral plasma membrane (GO:0016328)                                                      |
| cell-substrate adherens junction (GO:0005924)                   | proteasome core complex (GO:0005839)                                   | microtubule (GO:0005874)                                                                  |
| cell-substrate junction (GO:0030055)                            | nuclear lumen (GO:0031981)                                             | cytoplasmic region (GO:0099568)                                                           |
| small nuclear ribonucleoprotein complex (GO:0030532)            | intracellular non-membrane-bounded organelle (GO:0043232)              | contractile fiber part (GO:0044449)                                                       |

Figure S5
