# Supplementary figures and images for: A novel Microproteomic Approach Using Laser Capture Microdissection to Study Cellular Protrusions
Source: MDPI journal article supplement (doi:10.3390/ijms20051172), 2019-03-07

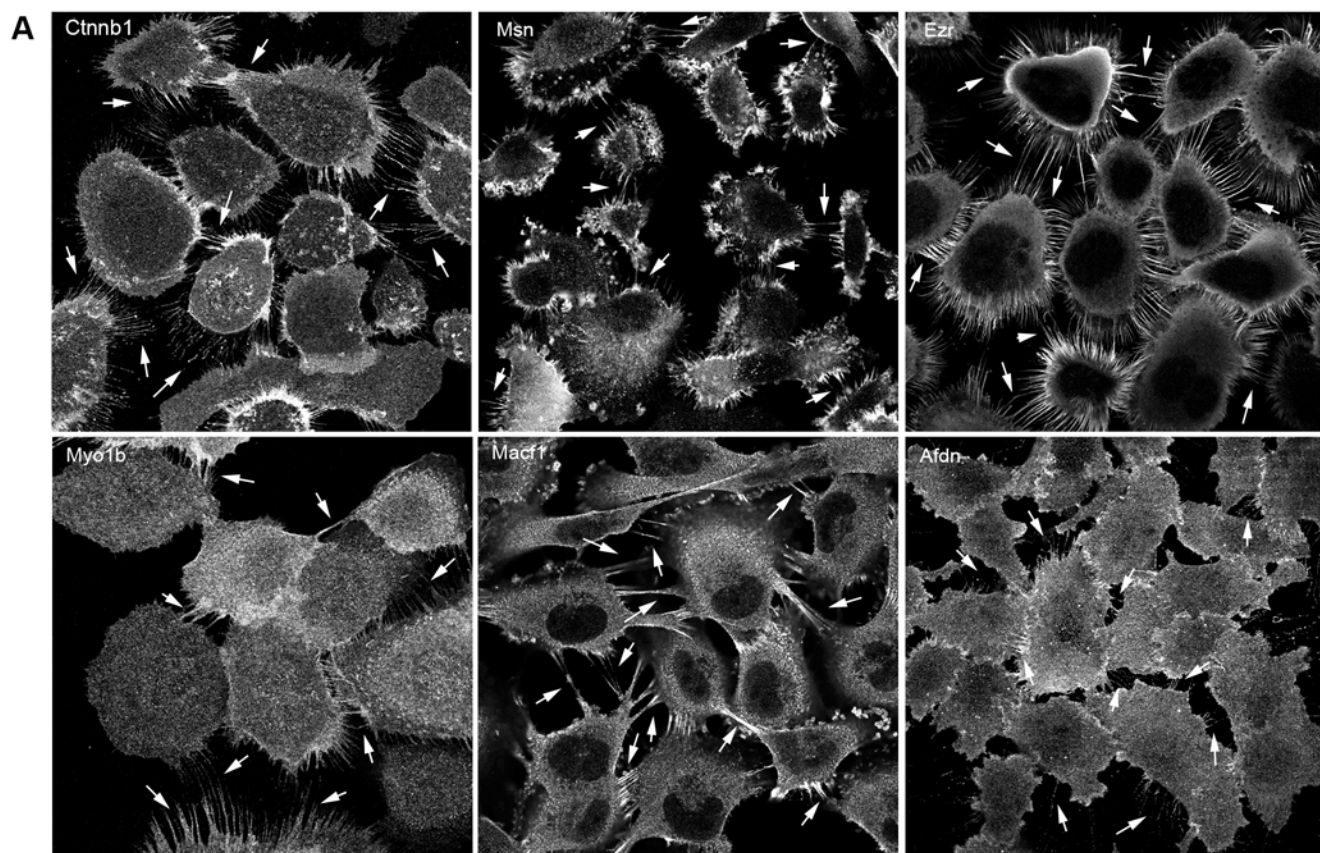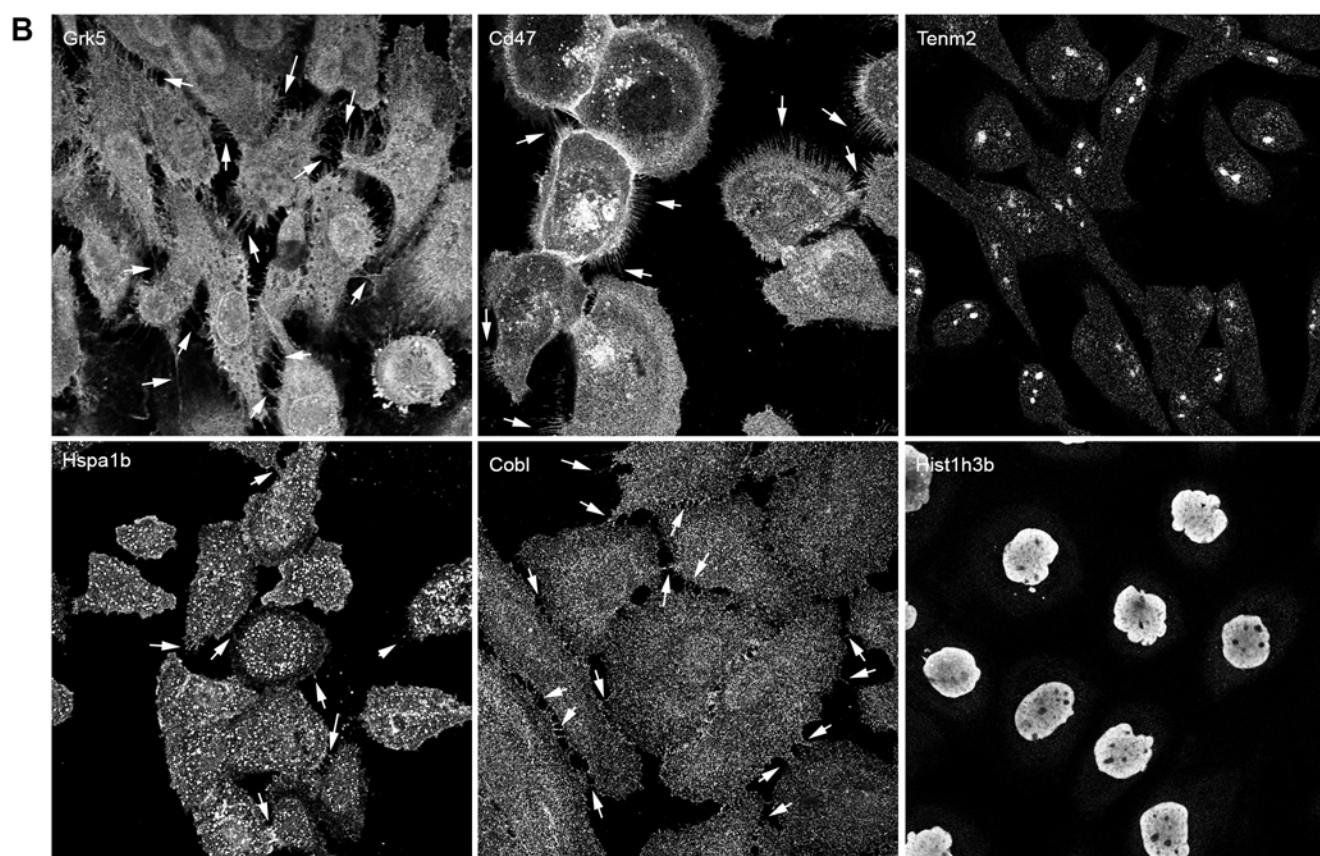

Figure S3

Supplement: s1 [file s1]

A

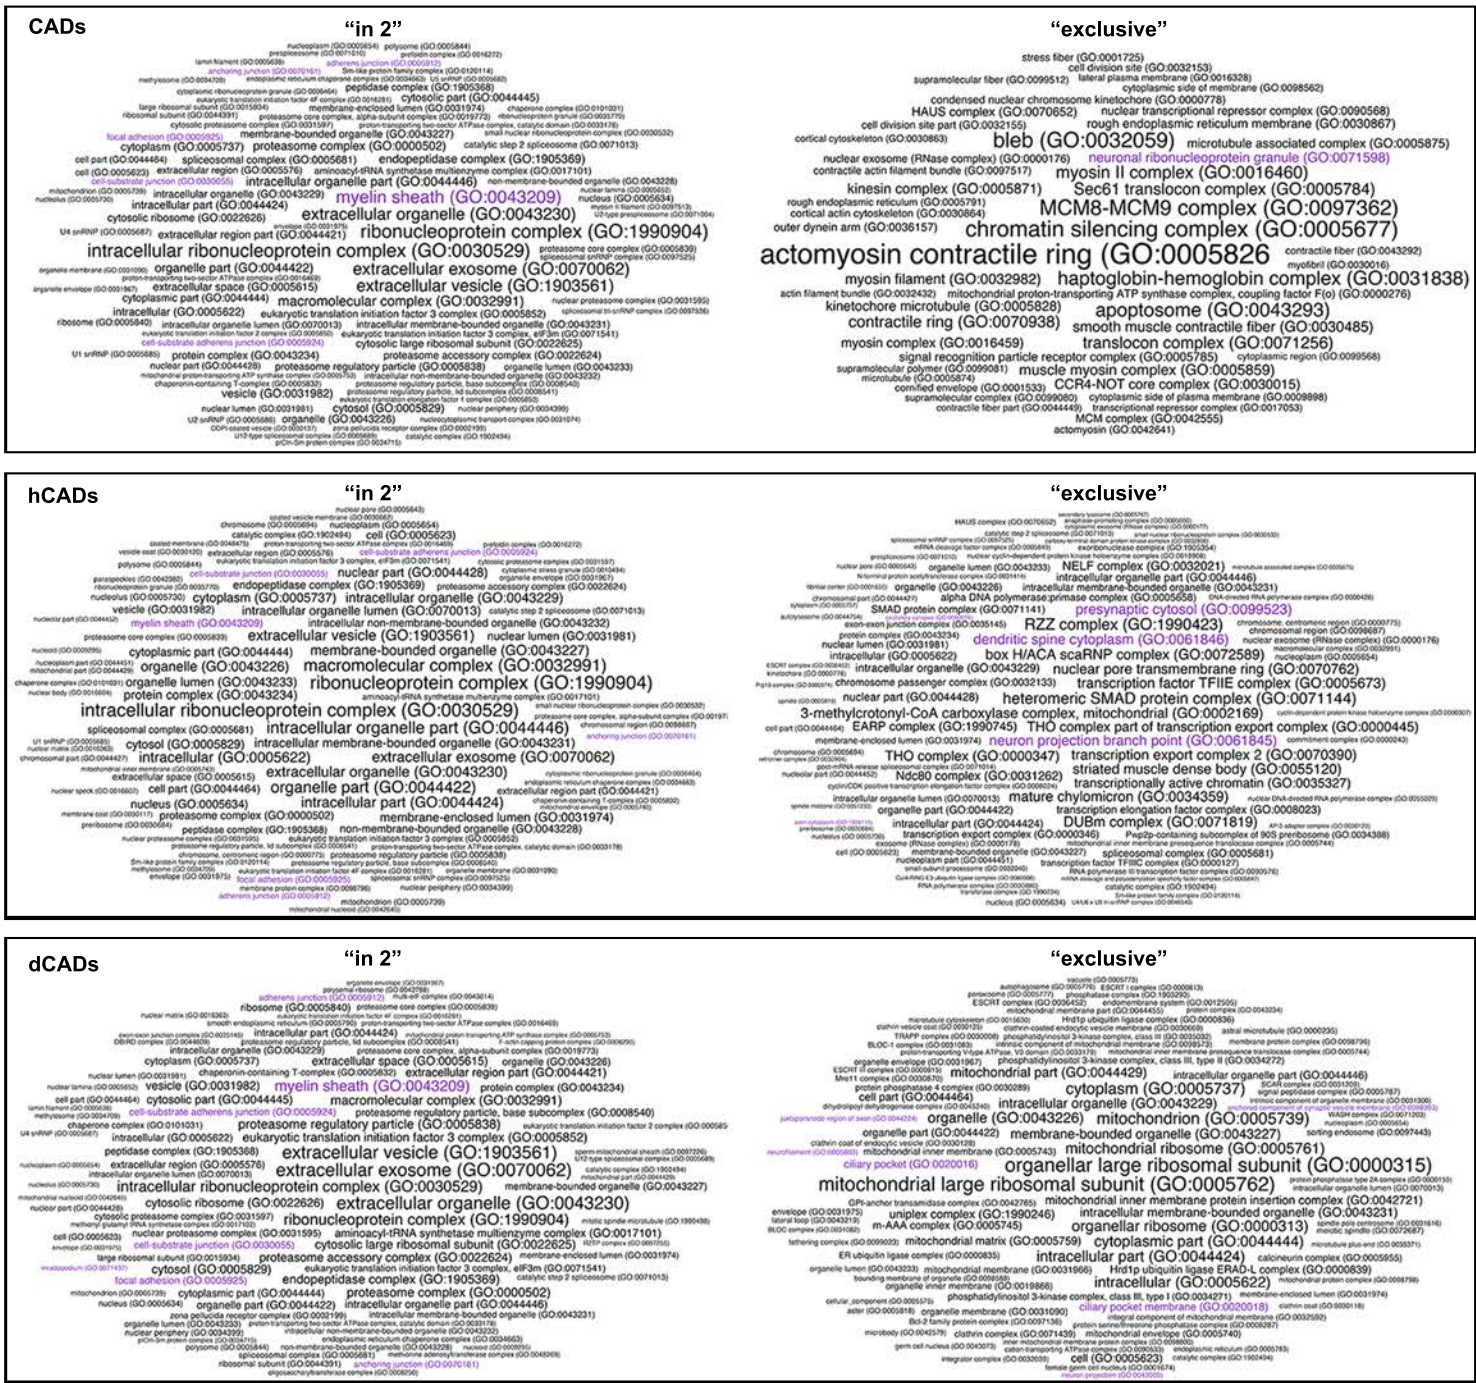

Figure S6

Supplement: s1 [file s1]
